# Supplementary material for: Design, synthesis, crystal structure, and herbicidal activity of novel pyrrolidine-2,4-dione derivatives incorporating an alkyl ether pharmacophore with natural tetramic acids as lead compounds
Source: Royal Society of Chemistry journal article supplement (doi:10.1039/d1nj00119a), 2021-01-01
Supplement: d1nj00119a1.pdf [file d1nj00119a1.pdf]

## Supplementary Information

Design, synthesis, crystal structure, and herbicidal activity of Novel pyrrolidine-2,4-dione derivatives incorporating an alkyl ether pharmacophore with natural tetramic acids as lead compounds

Min Chen,<sup>ab</sup> Chun-Wen Geng,<sup>a</sup> Ling Han,<sup>a</sup> Yu Liu,<sup>a</sup> Yong-Kai Yu,<sup>a</sup> Ai-Min Lu,<sup>ab</sup> Chun-Long Yang\*<sup>ab</sup> and Guo-Hua Li\*<sup>ab</sup>

<sup>a</sup>Jiangsu Key Laboratory of Pesticide Science, Nanjing Agricultural University, Nanjing, 210095, PR China

<sup>b</sup>Department of Chemistry, College of Sciences, Nanjing Agricultural University, Nanjing, 210095, PR China

### Table of Contents

|                                                       |     |
|-------------------------------------------------------|-----|
| 1. Spectrograms of target compounds.....              | S1  |
| 2. Crystallographic data of compound <b>10a</b> ..... | S47 |

#### 1. Spectrograms of title compounds

##### Compound 4a:

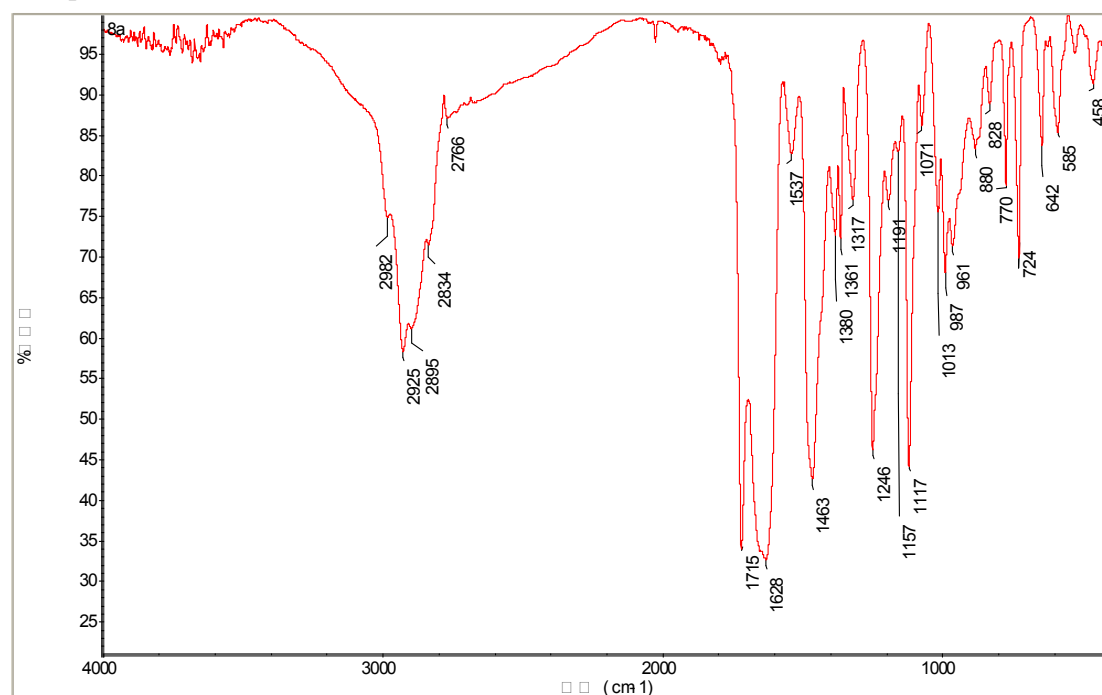

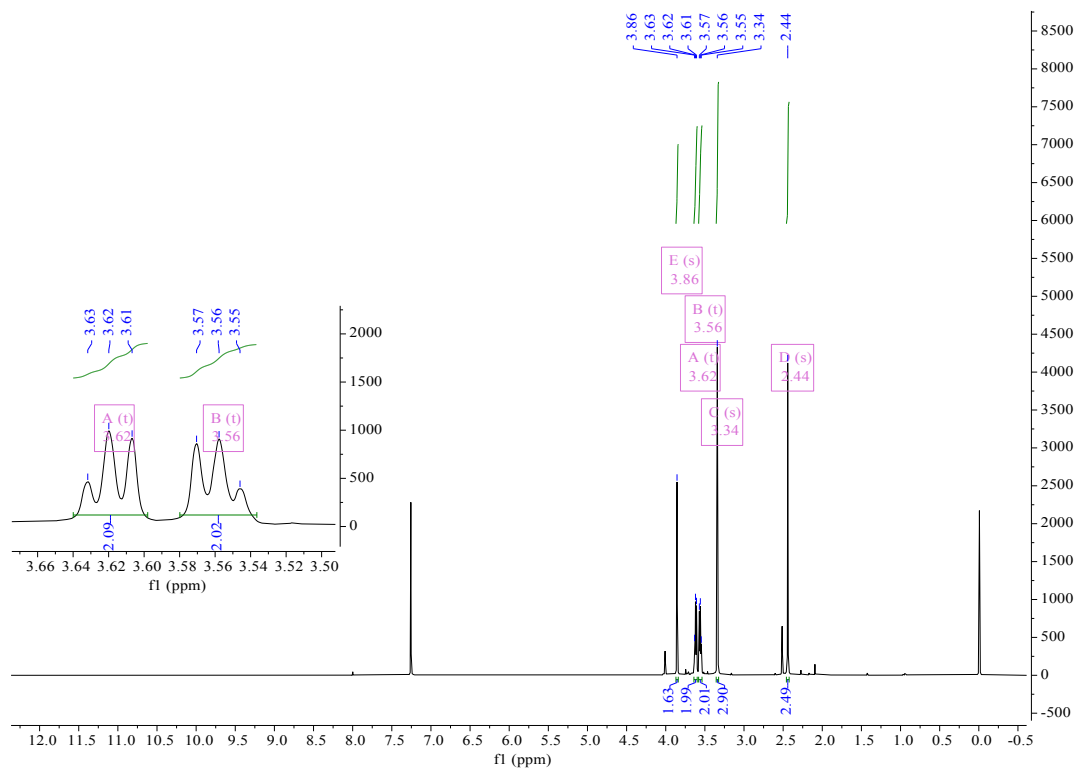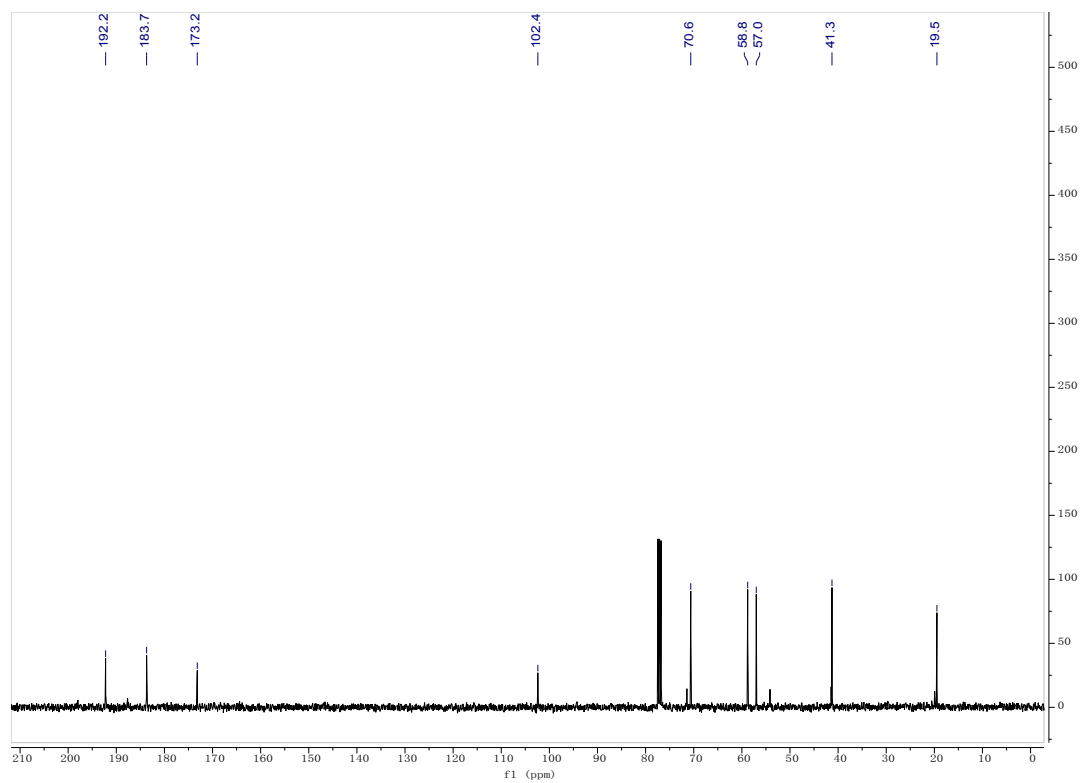

Spectrum from 06.wiff (sample 1) - Sample06, Experiment 1, +TOF MS (80 - 1000) from 0.087 to 0.096 min

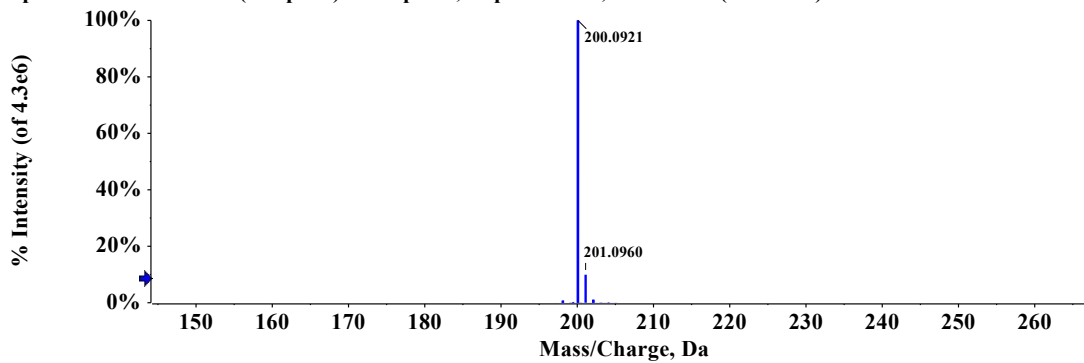

Compound 4b:

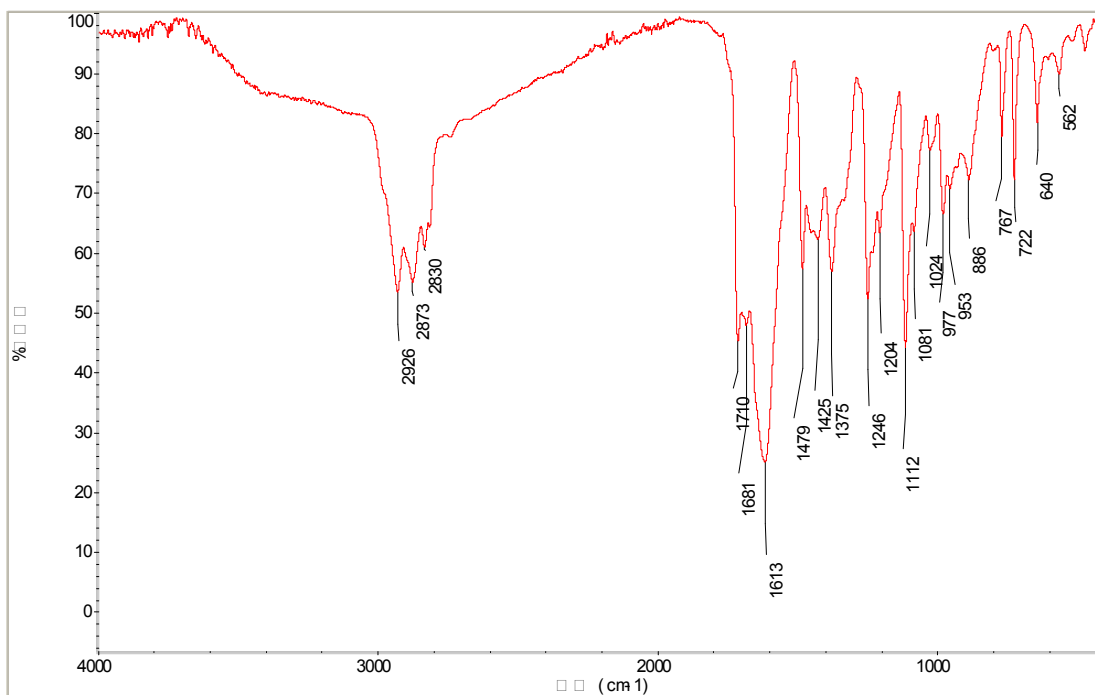

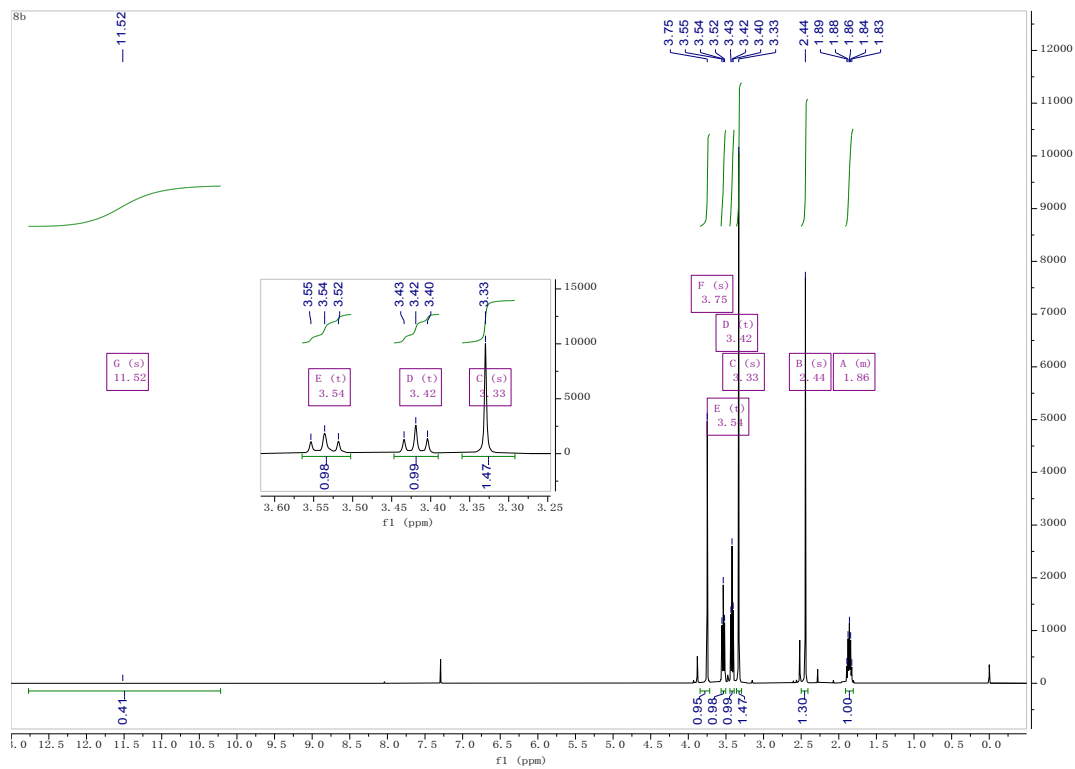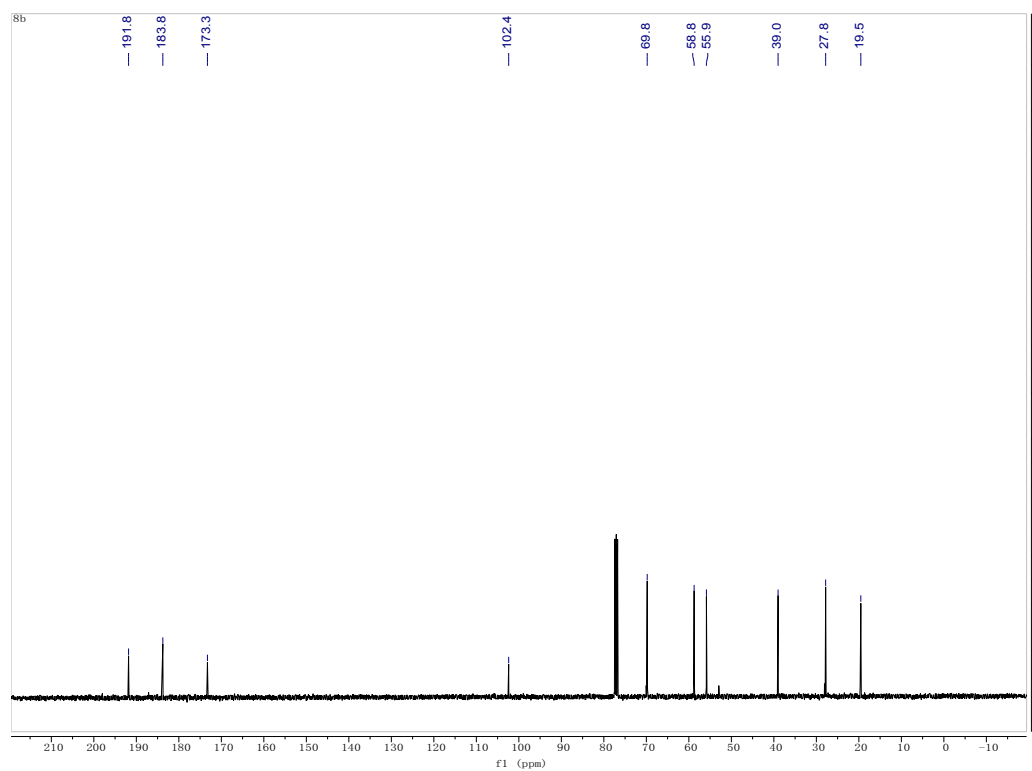

Spectrum from 1.wiff (sample 1) - Sample001, Experiment 1, +TOF MS (60 - 800) from 0.106 to 0.135 min

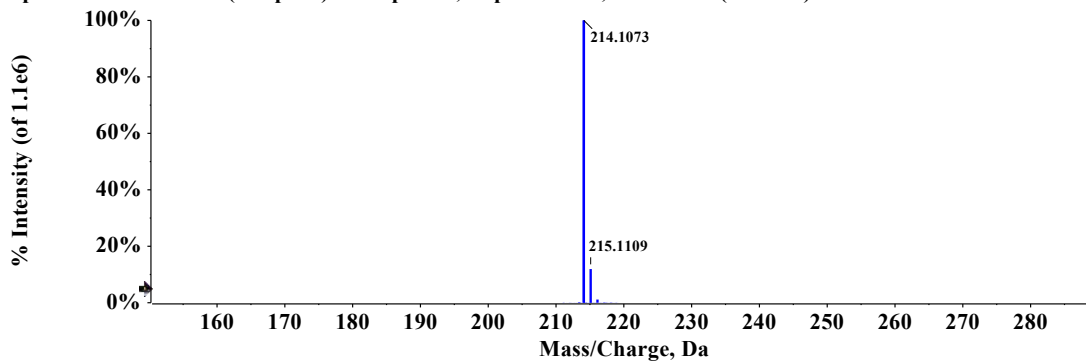

Compound 4c:

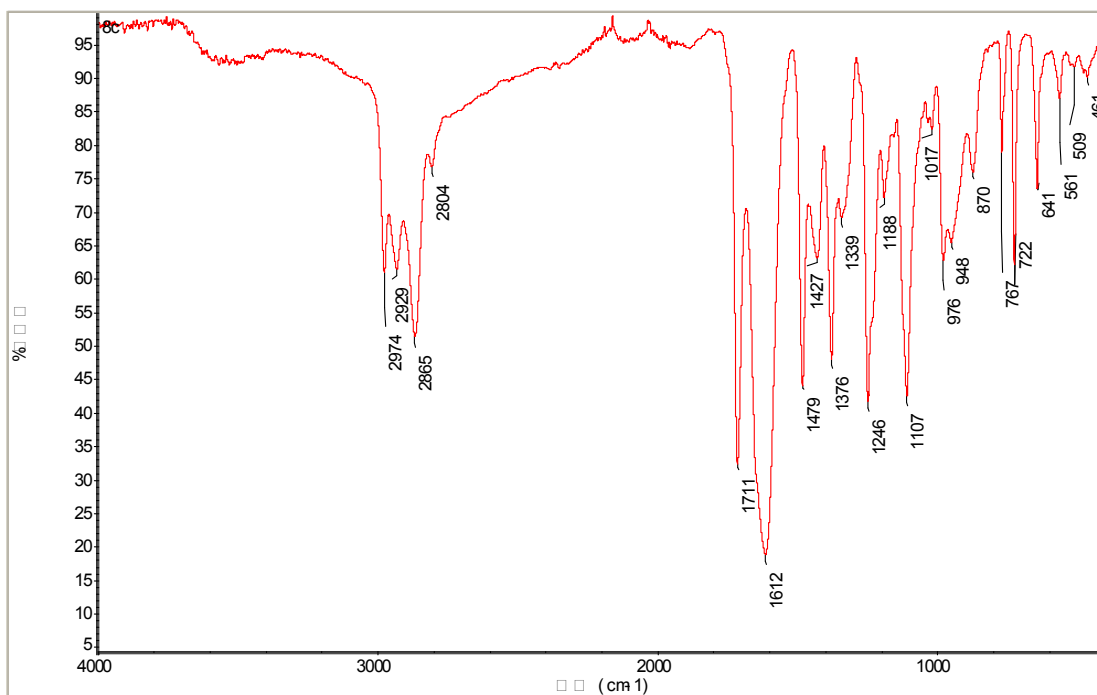

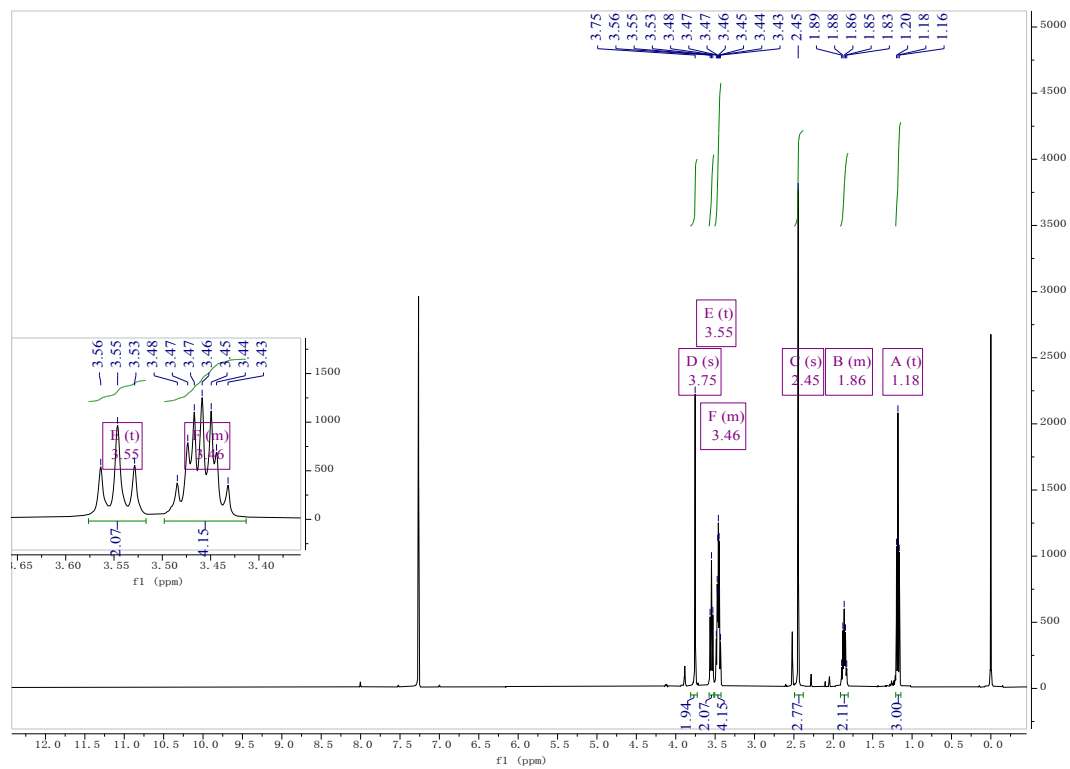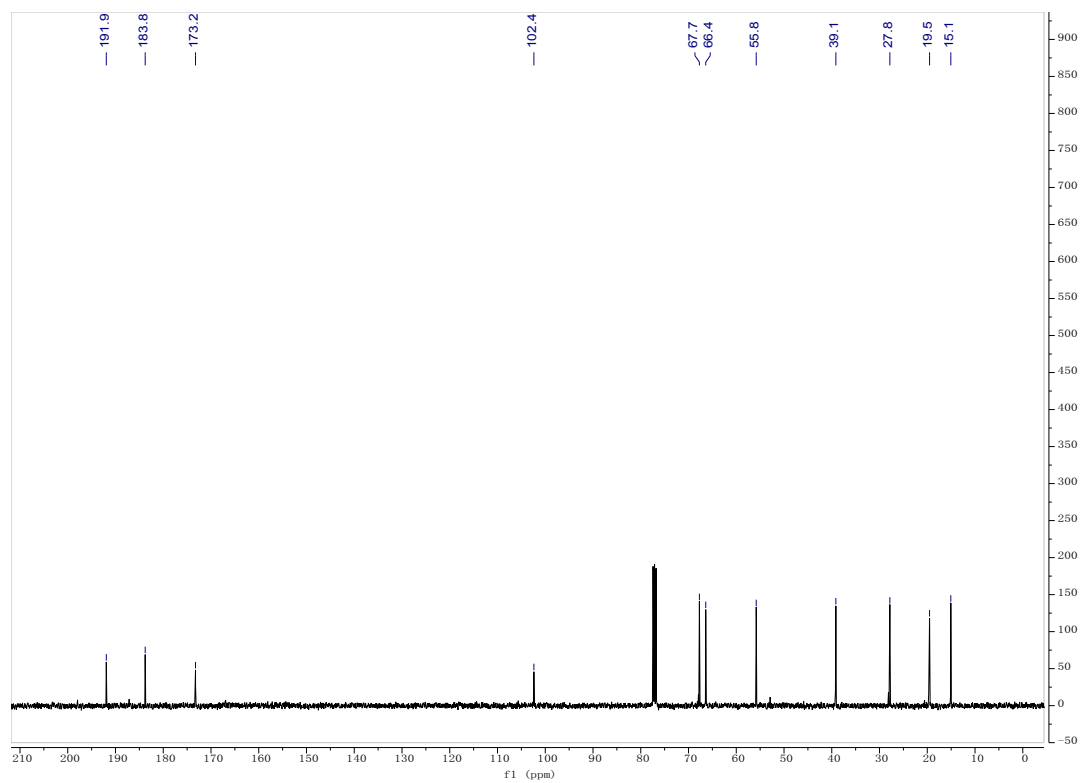

Spectrum from 07.wiff (sample 1) - Sample07, Experiment 1, +TOF MS (80 - 1000) from 0.084 to 0.093 min

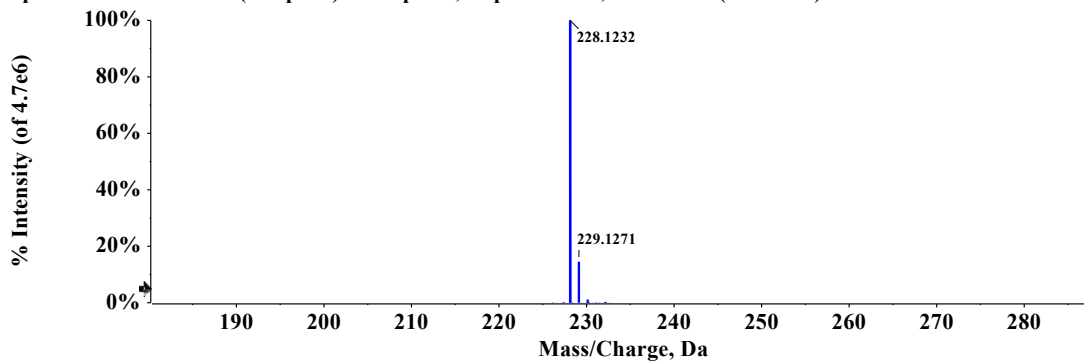

Compound 4d:

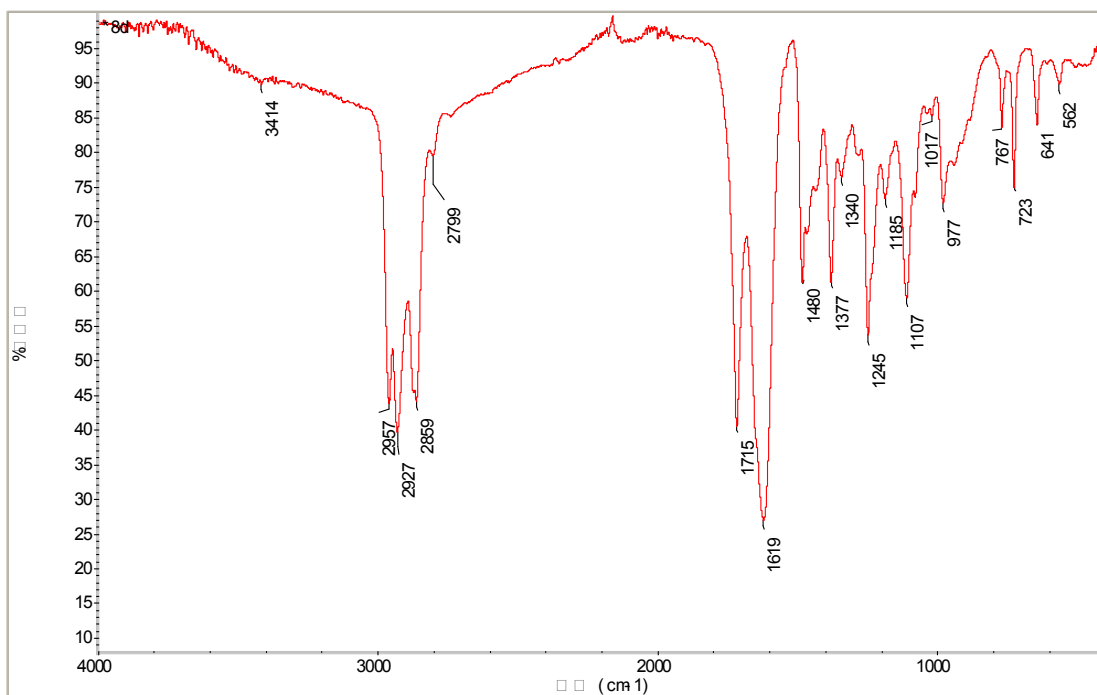

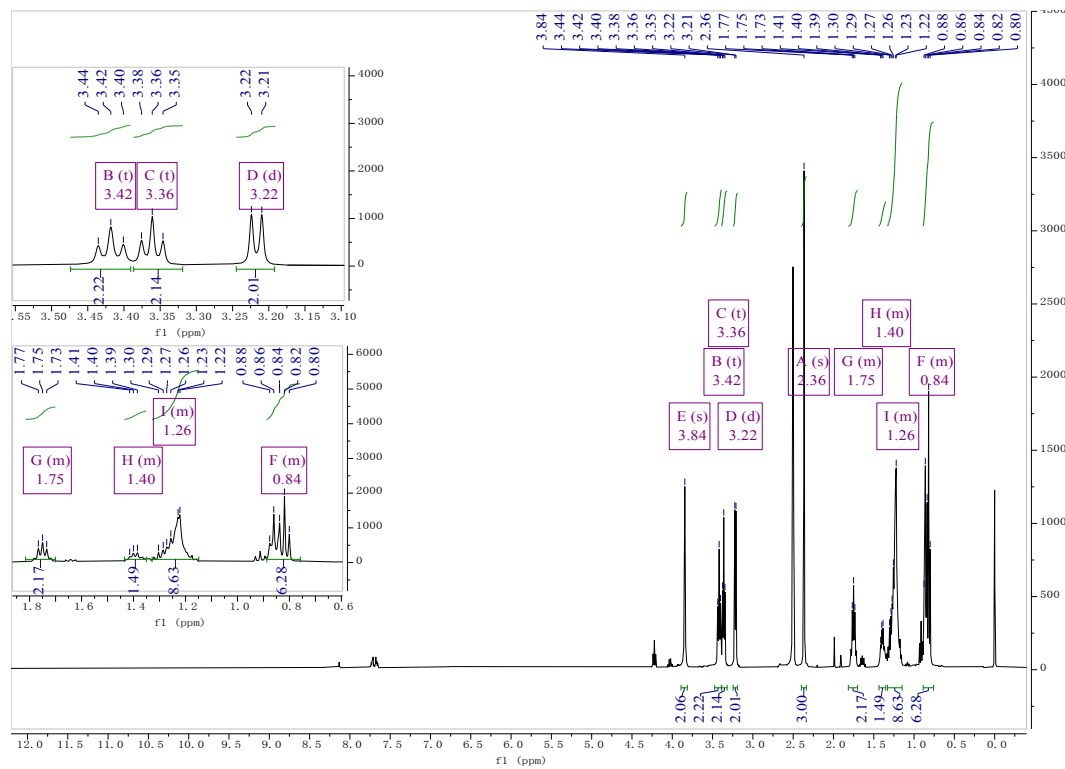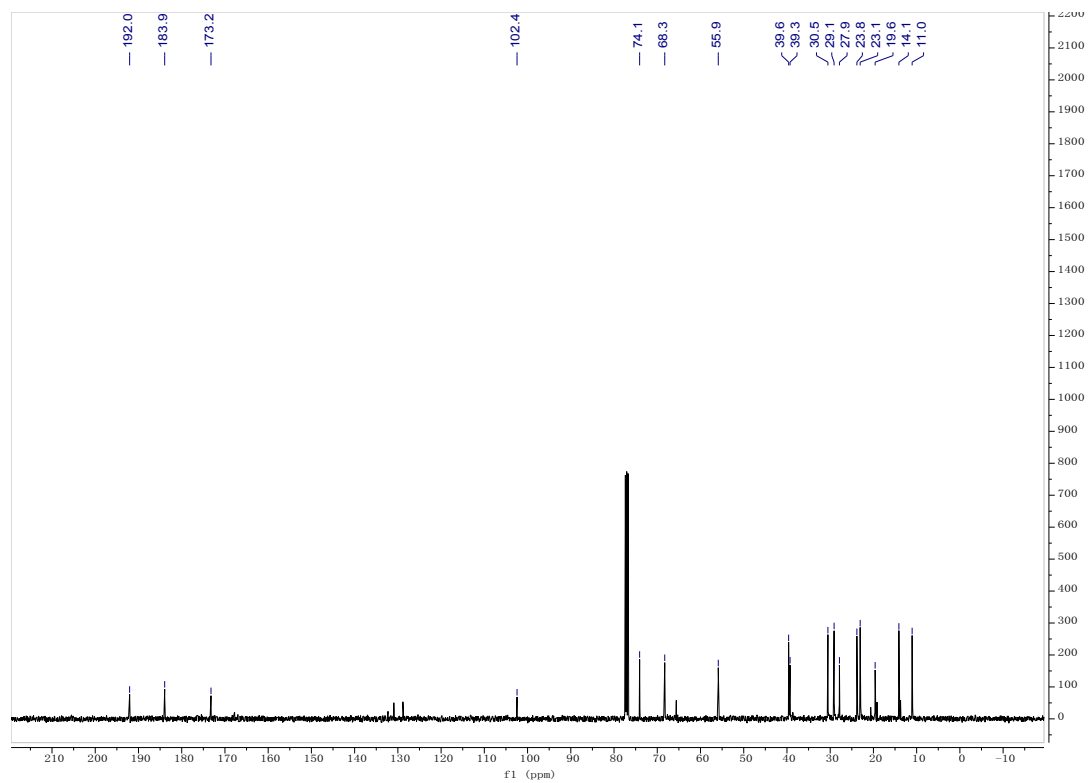



Spectrum from 08.wiff (sample 1) - Sample08, Experiment 1, +TOF MS (80 - 1000) from 0.095 min

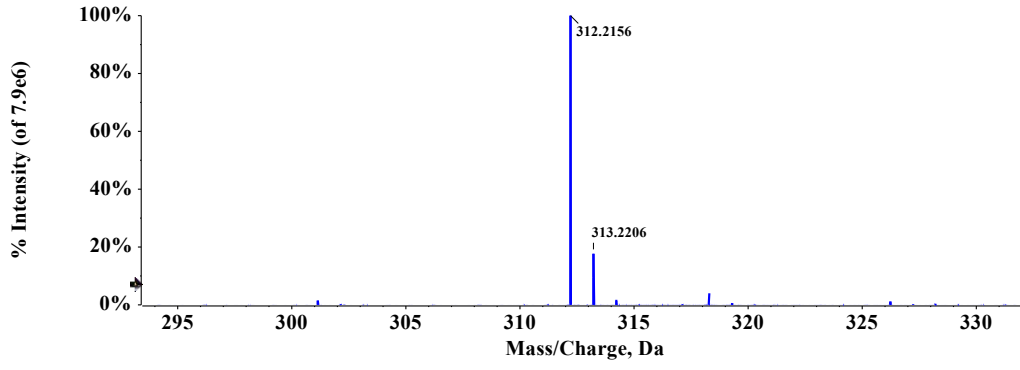

Compound 10a:

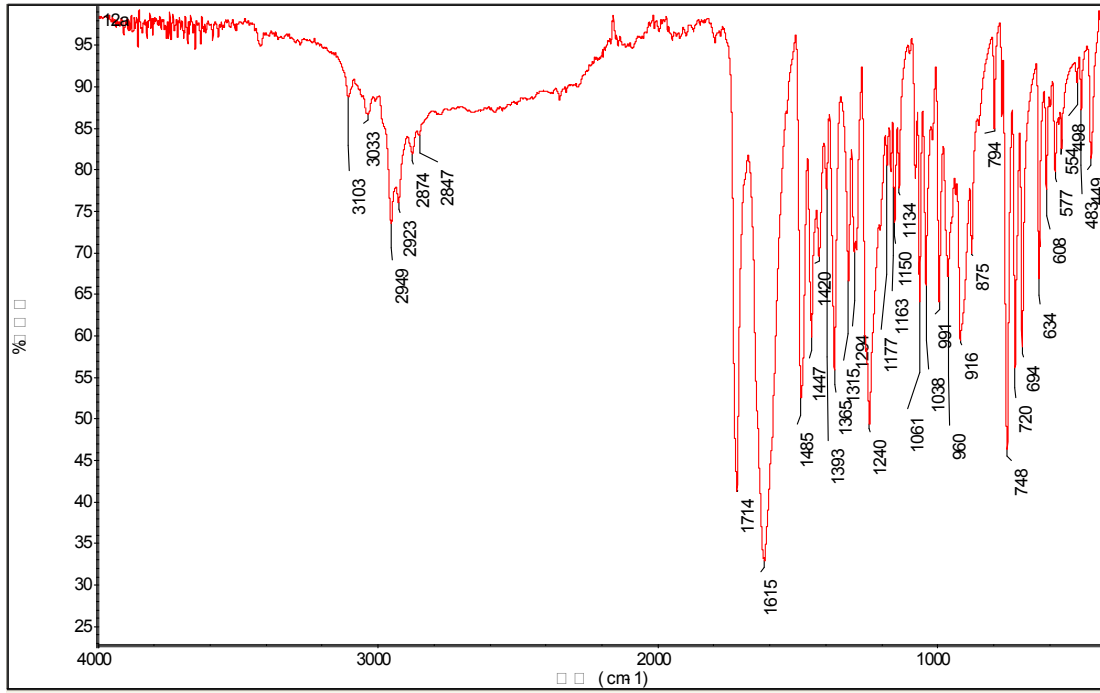

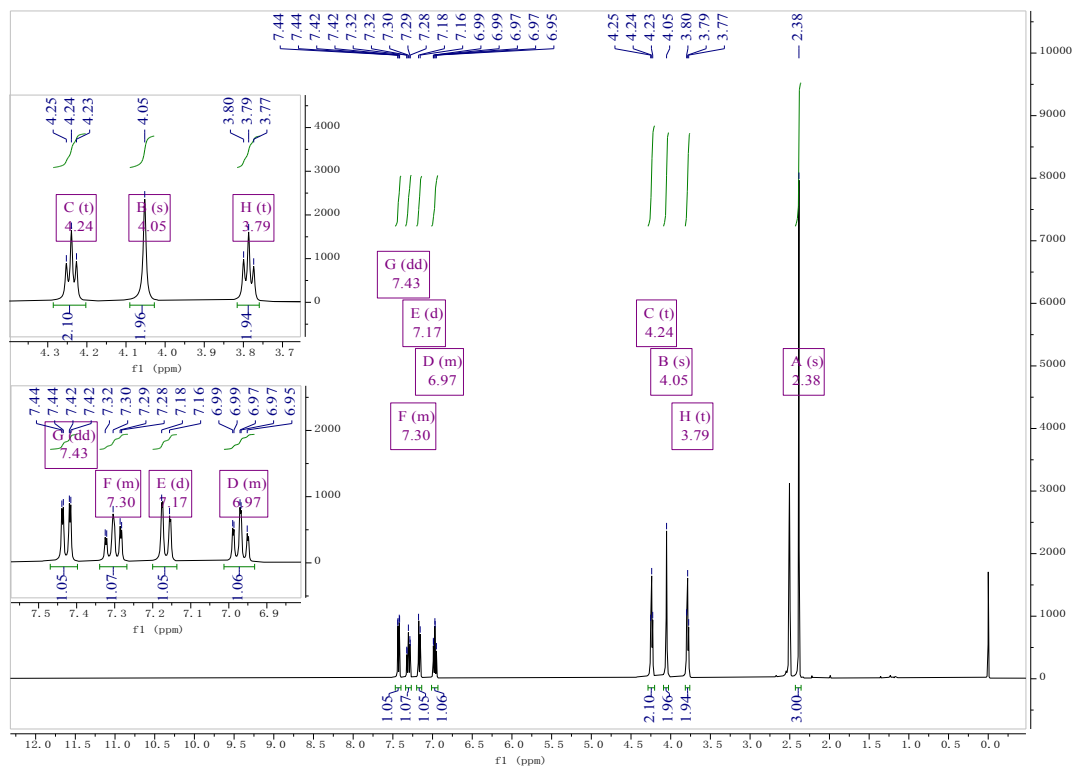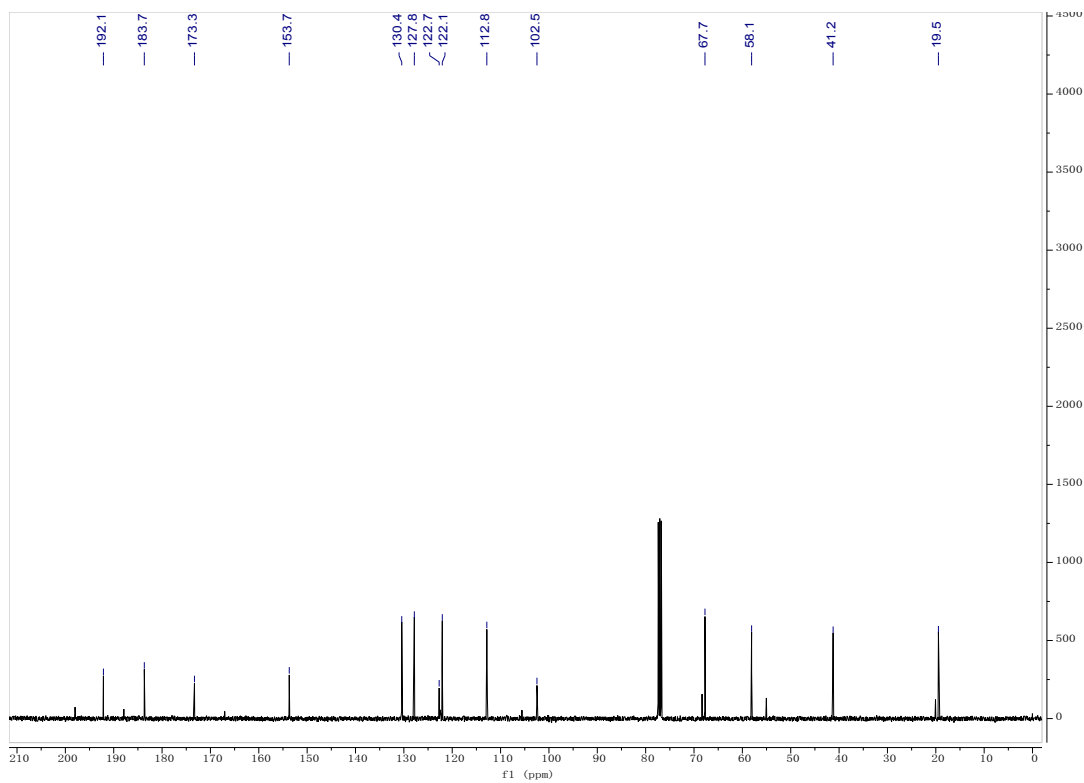

Spectrum from 12a gc.wiff (sample 1) - Sample014, E...iment 1, +TOF MS (60 - 800) from 0.102 to 0.113 min

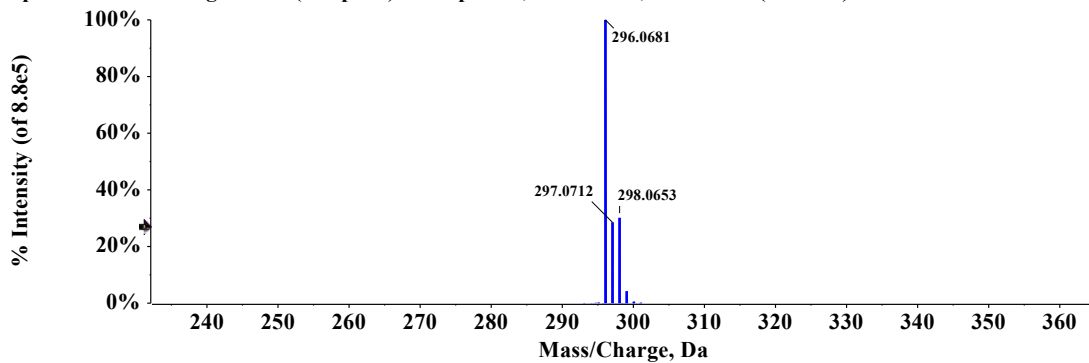

Compound 10b:

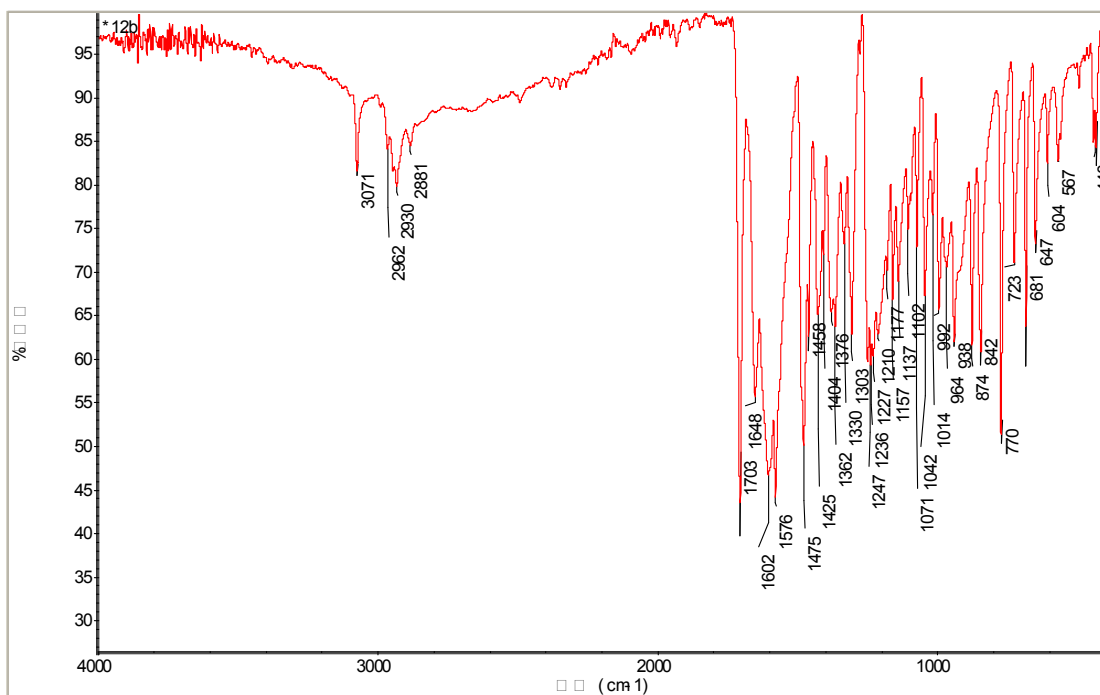

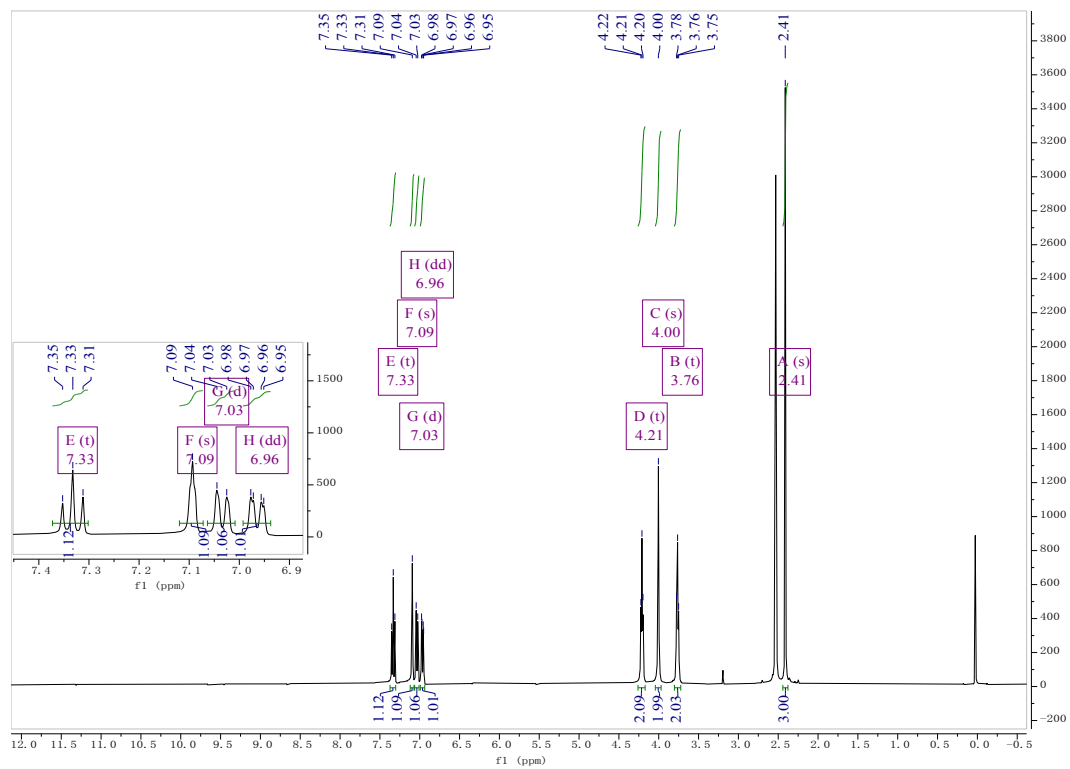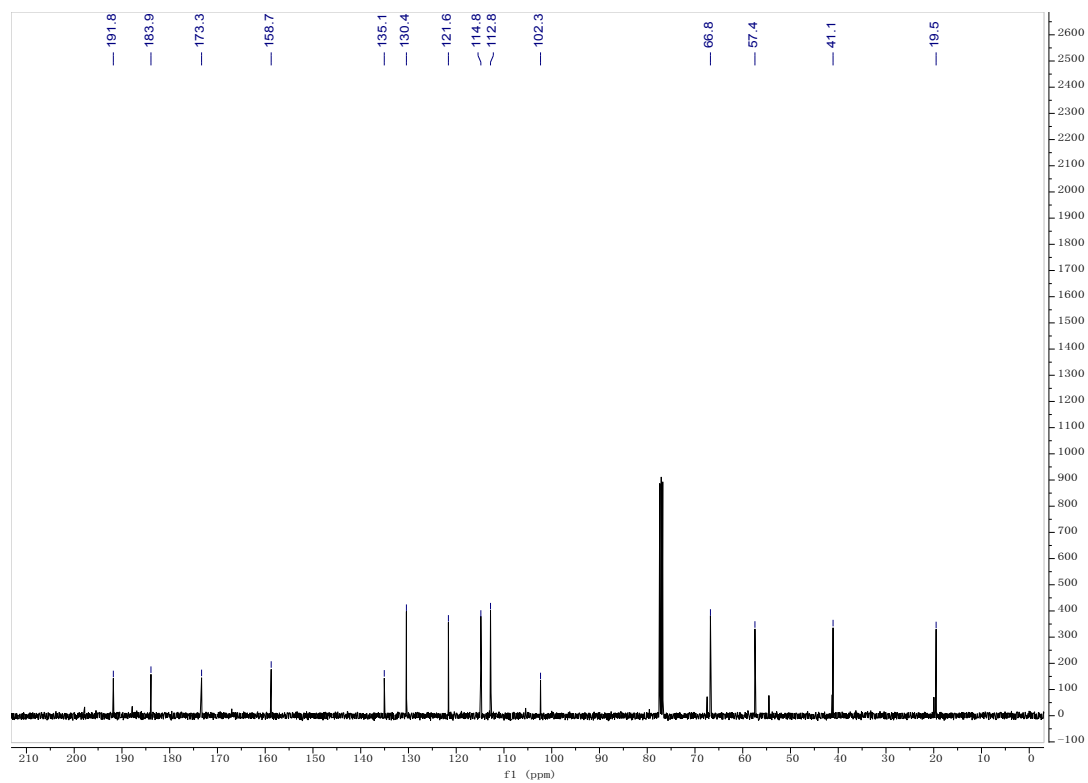

Spectrum from 10.wiff (sample 1) - Sample10, Experiment 1, +TOF MS (80 - 800) from 0.073 to 0.082 min

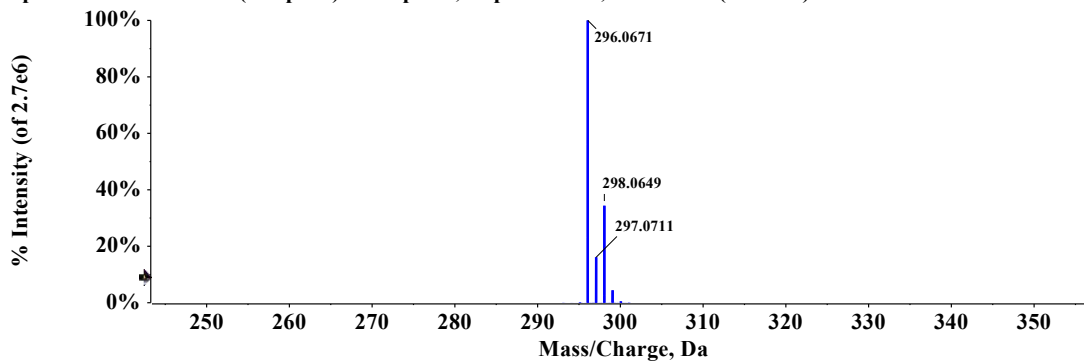

Compound 10c:

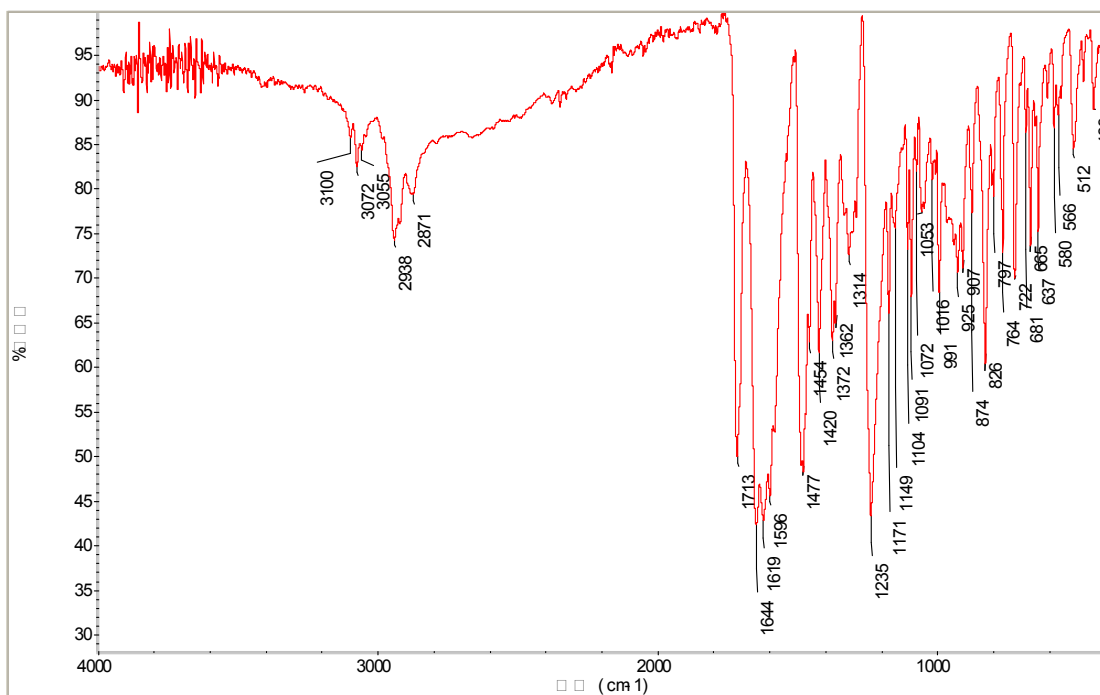

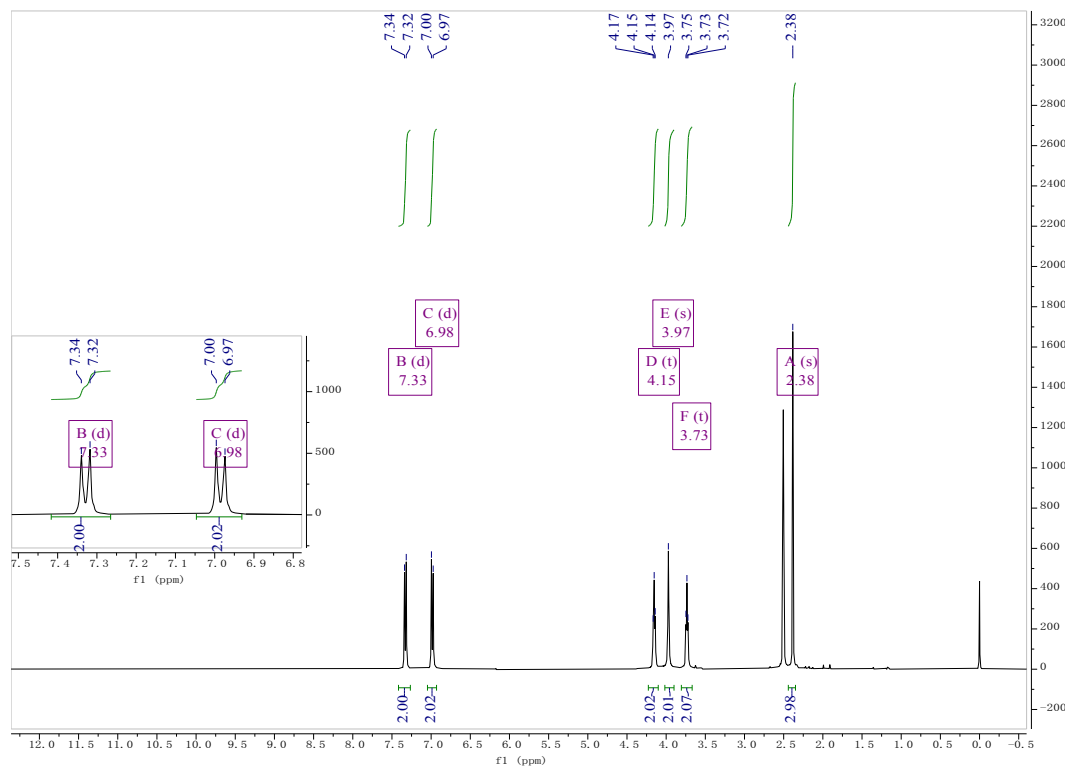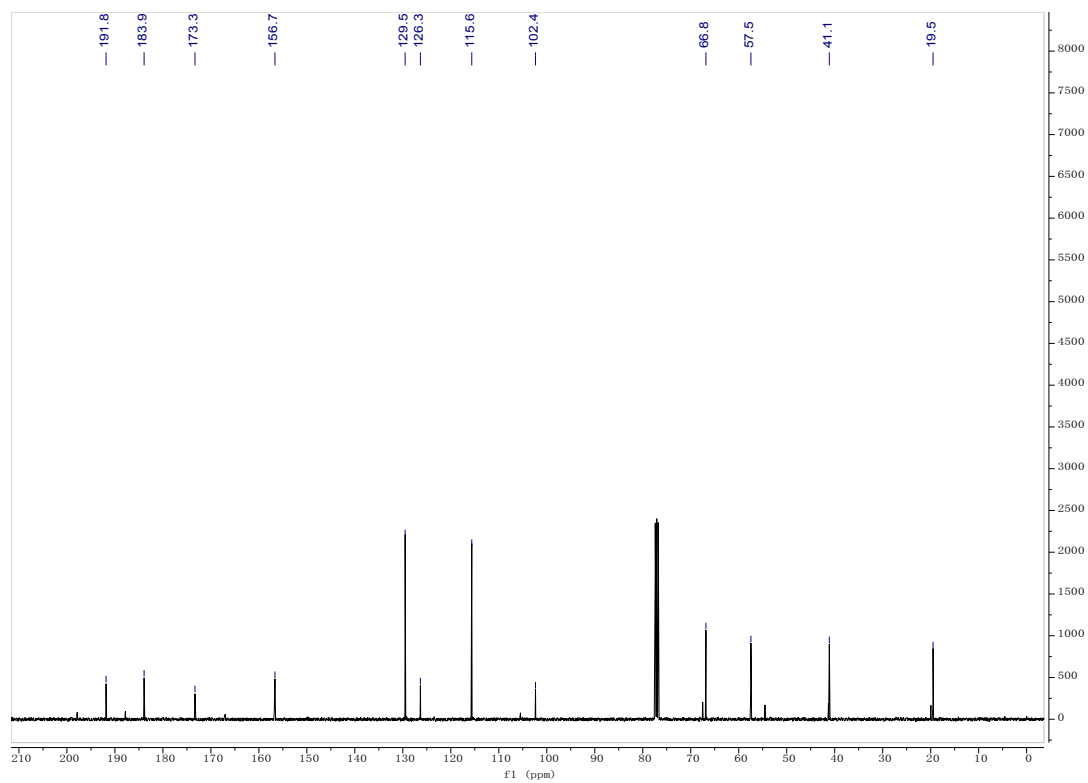

Spectrum from 01.wiff (sample 1) - Sample01, Experiment 1, +TOF MS (80 - 800) from 0.076 to 0.086 min

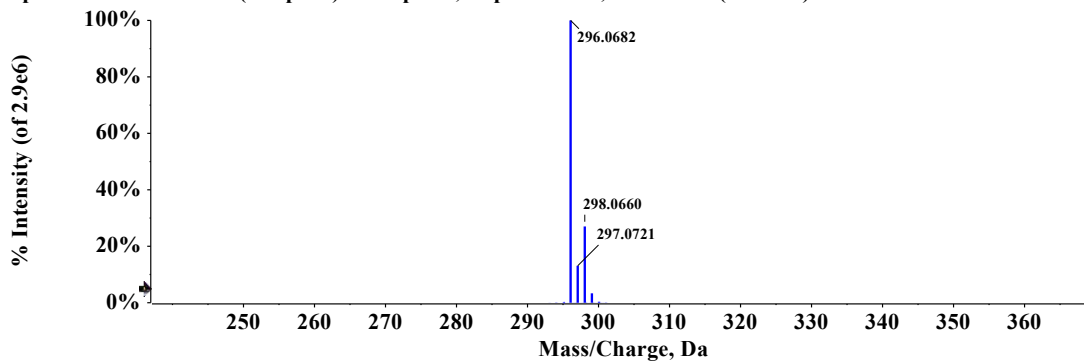

Compound 10d:

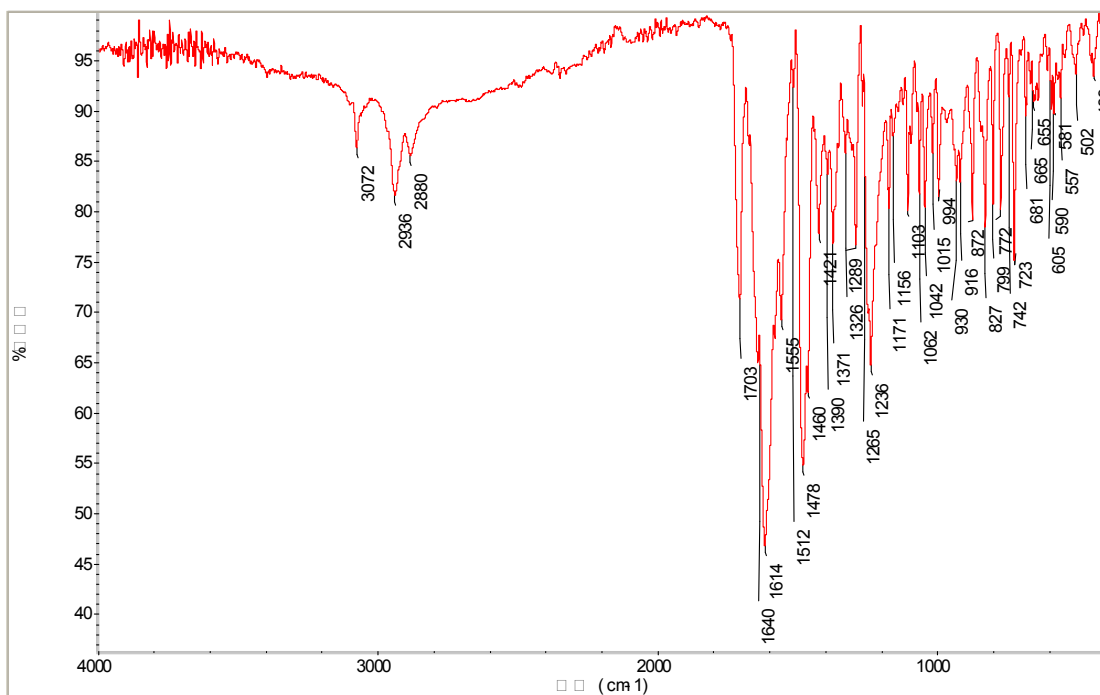

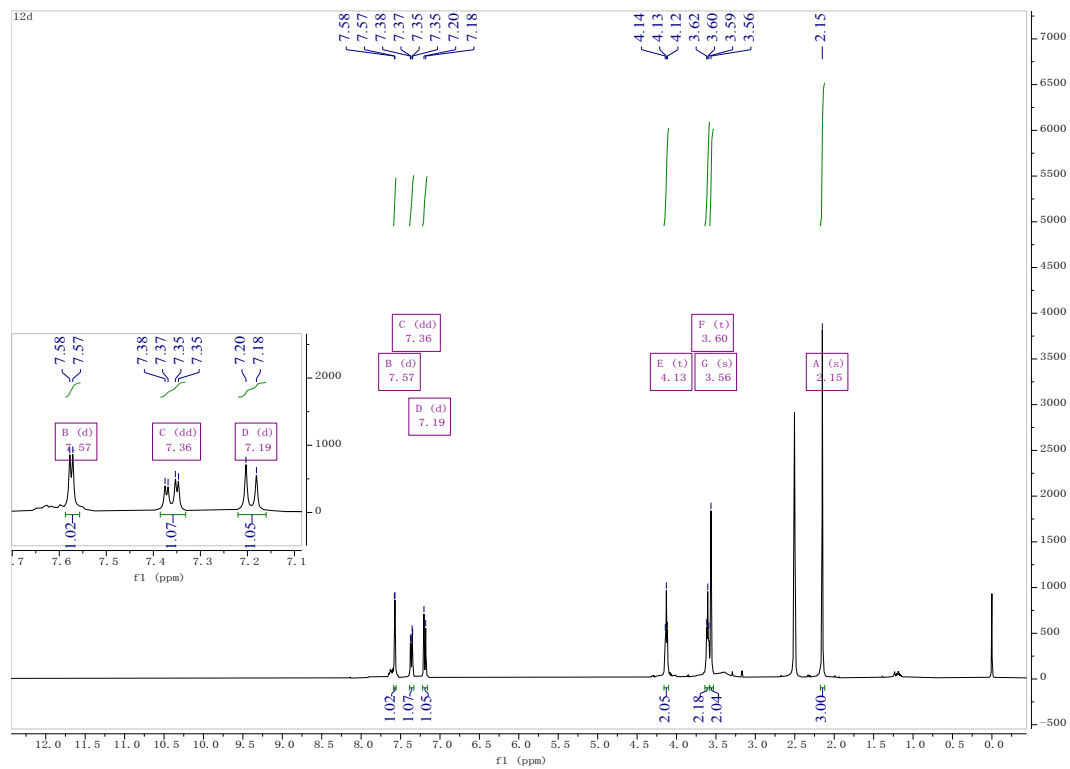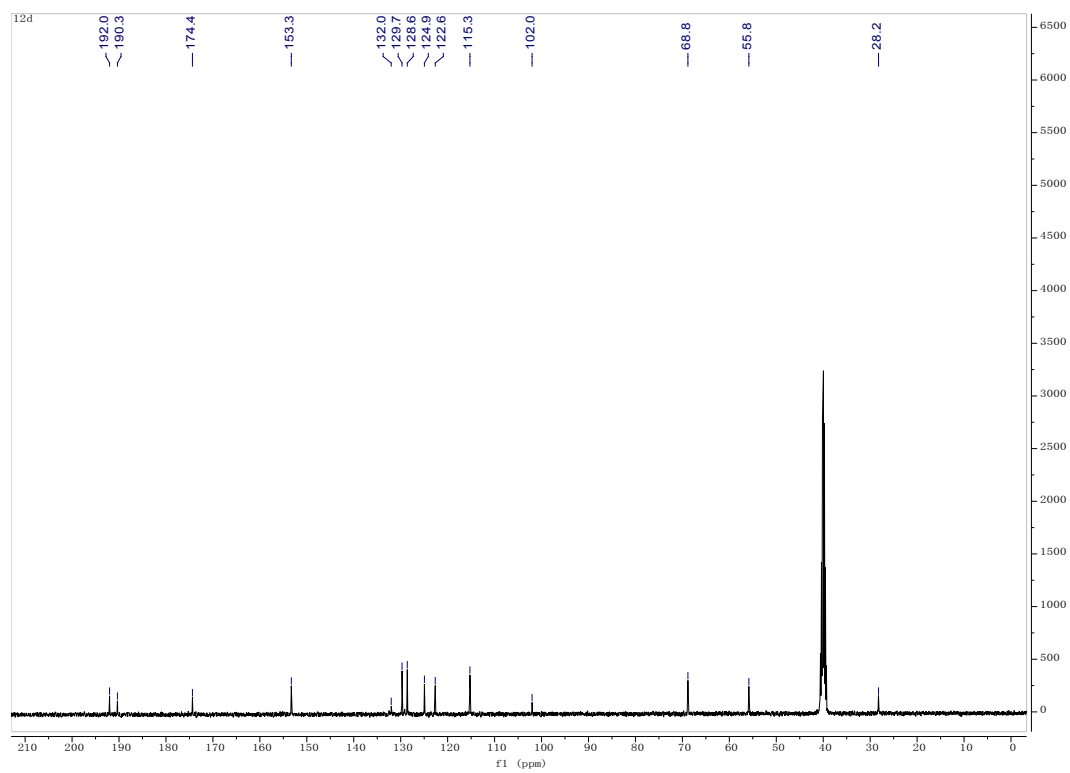



Spectrum from 11.wiff (sample 1) - Sample11, Experiment 1, +TOF MS (80 - 1000) from 0.055 to 0.064 min

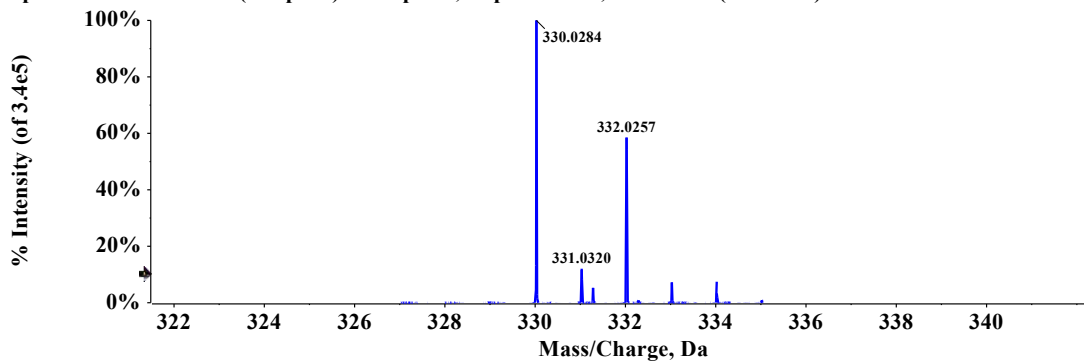

Compound 10e:

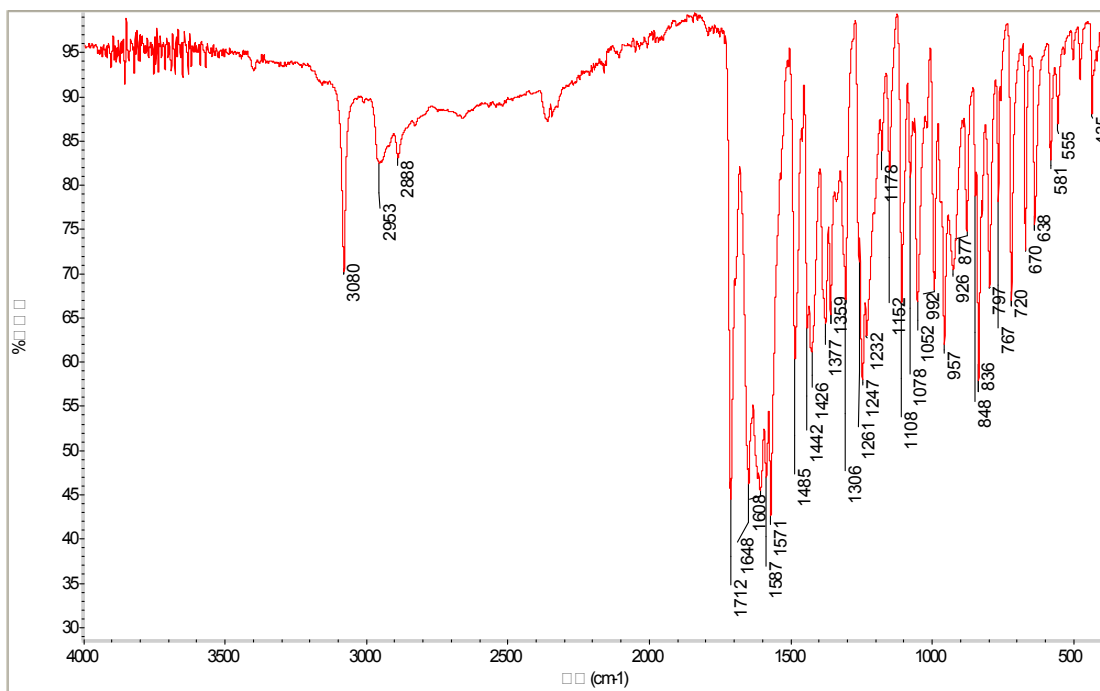

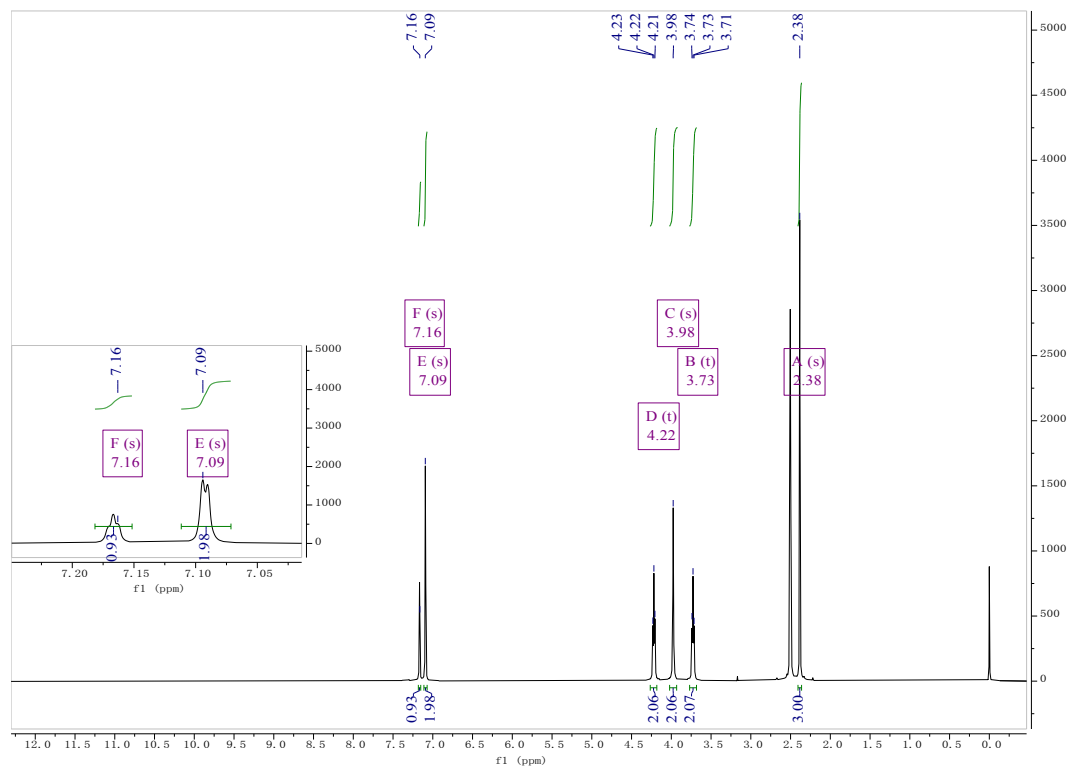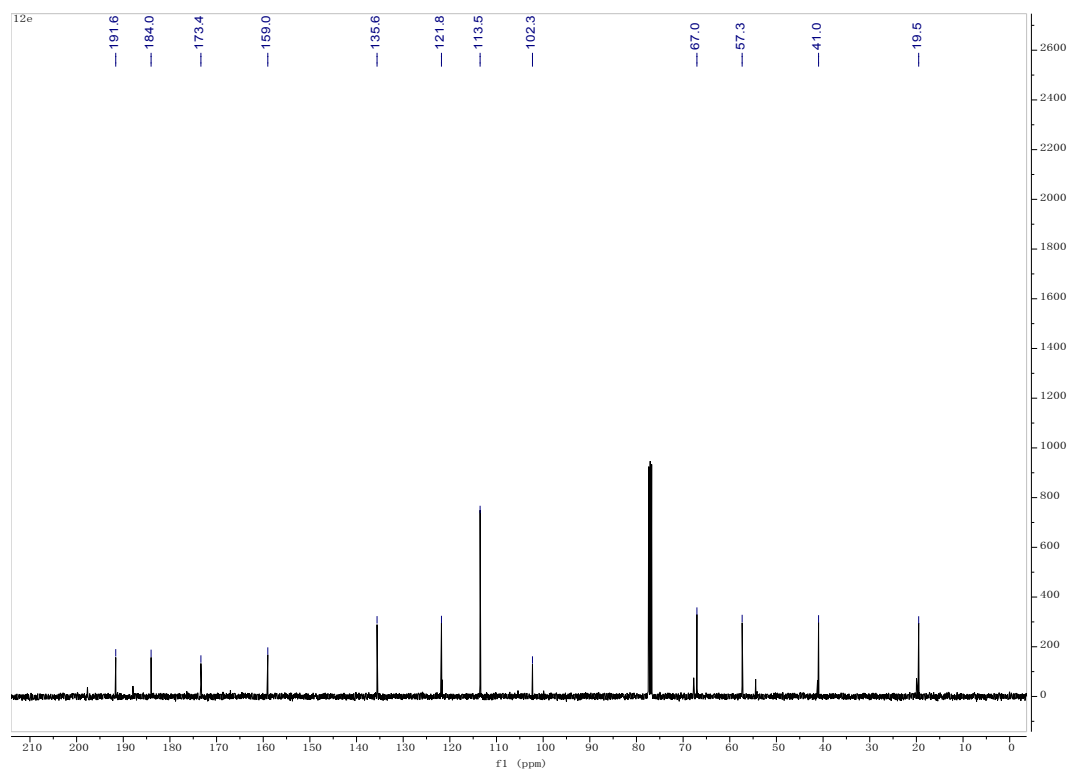

Spectrum from 08.wiff (sample 1) - Sample08, Experiment 1, +TOF MS (80 - 800) from 0.077 to 0.086 min

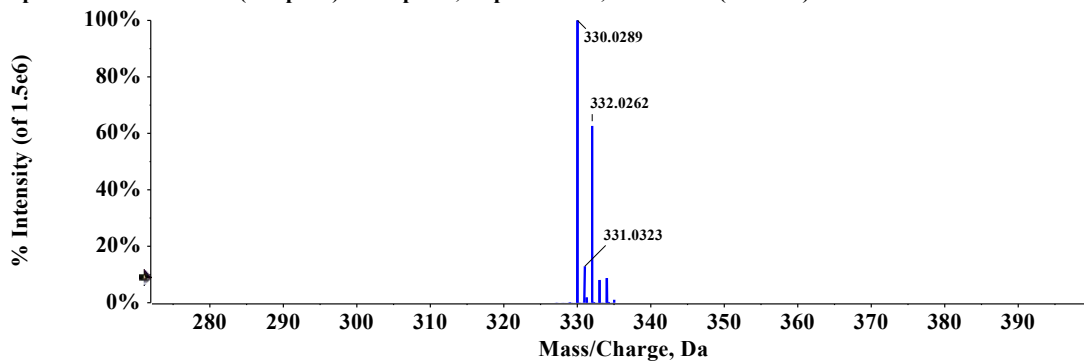

Compound 10f:

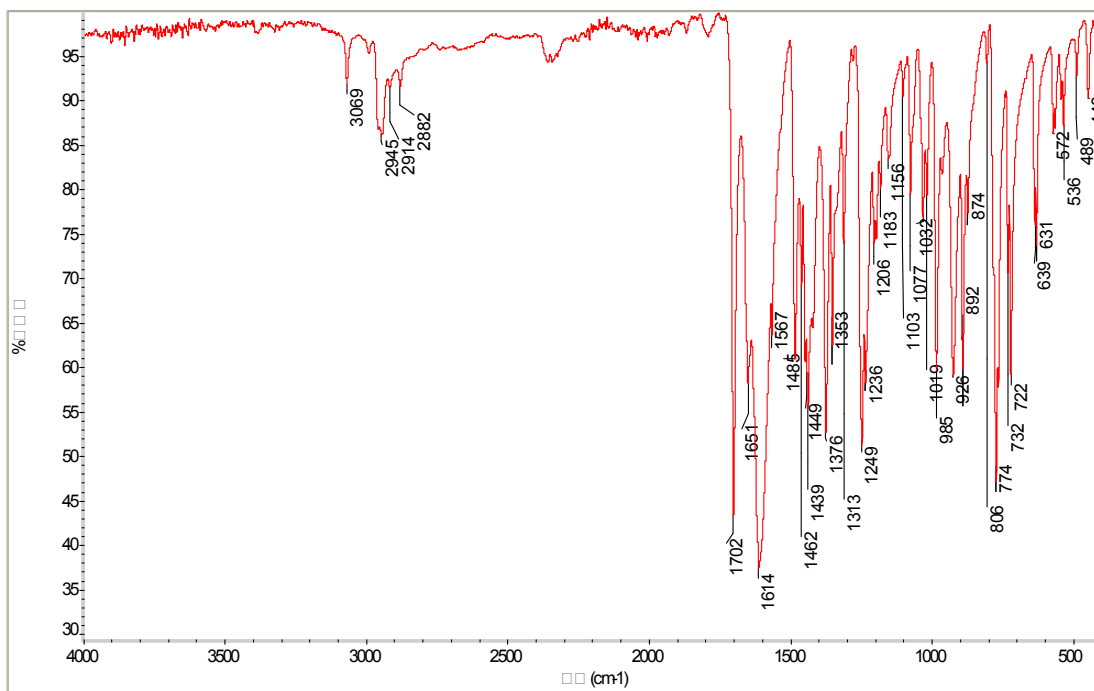

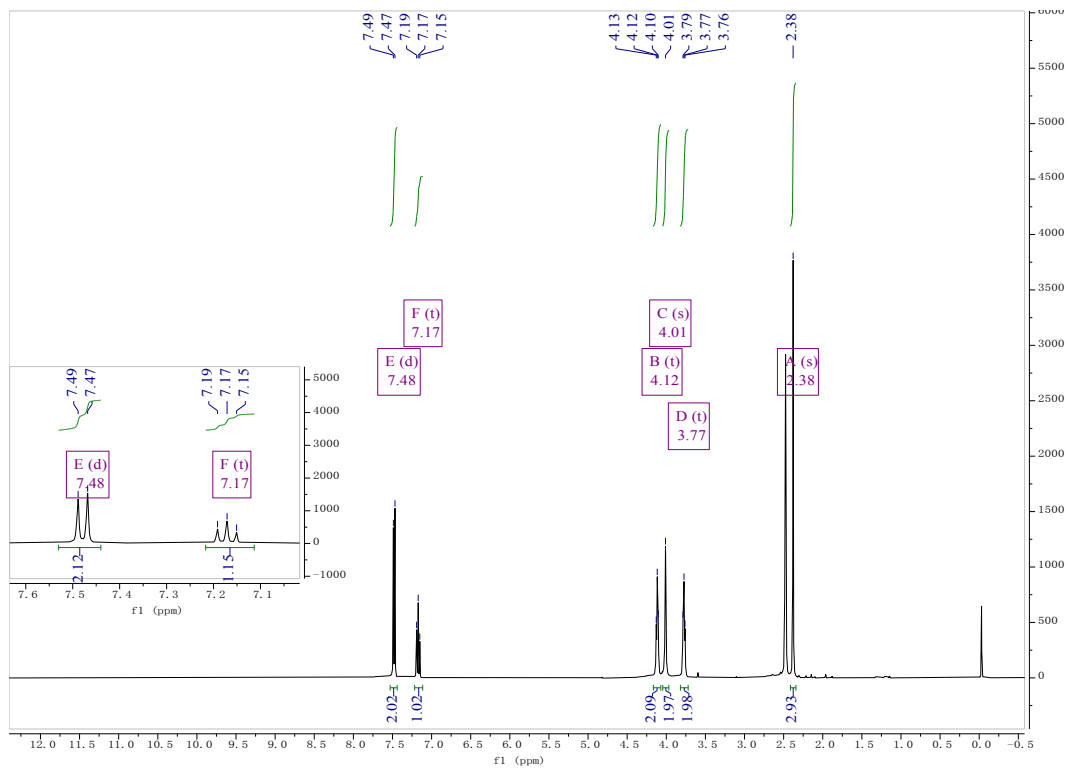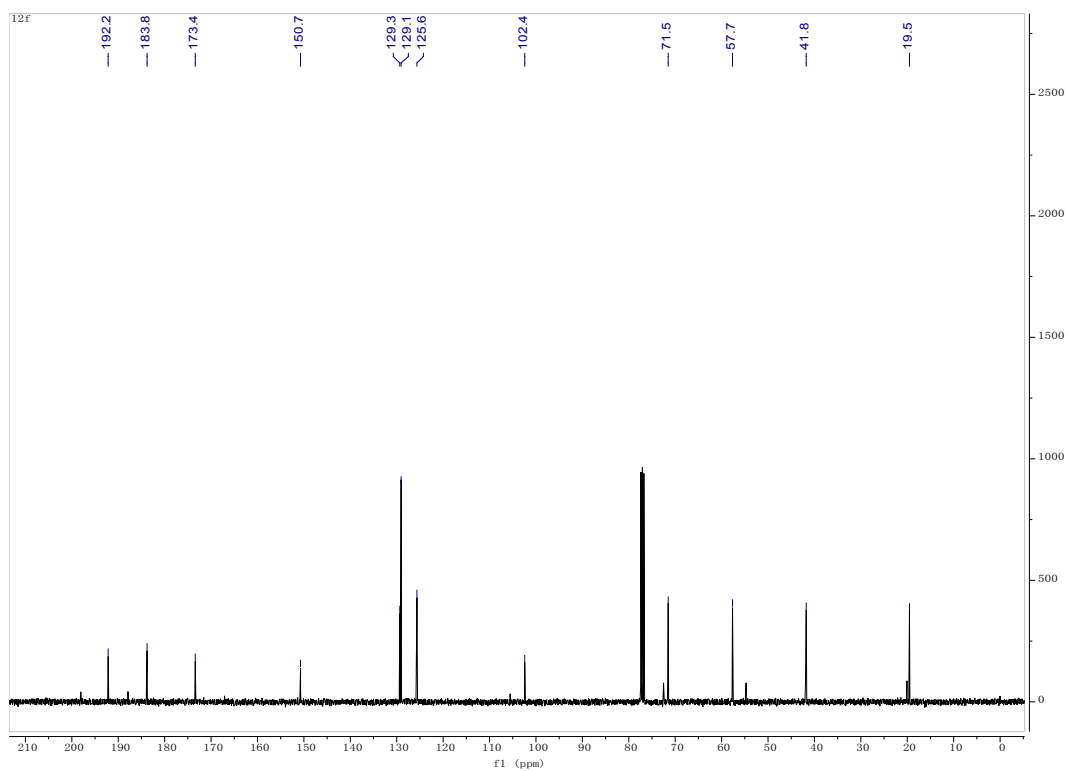

Spectrum from 02.wiff (sample 1) - Sample02, Experiment 1, +TOF MS (80 - 800) from 0.068 to 0.077 min

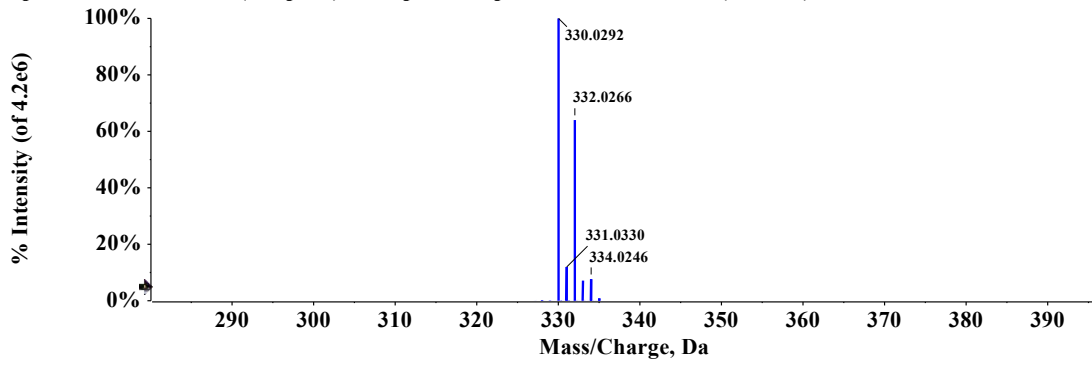

Compound 10g:

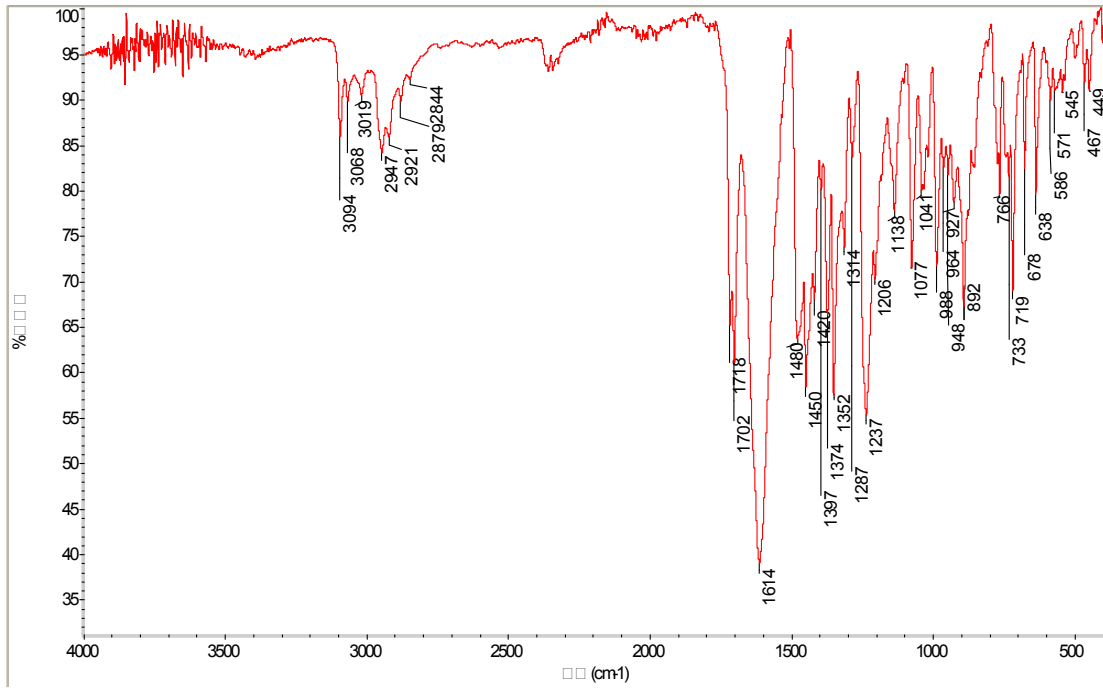

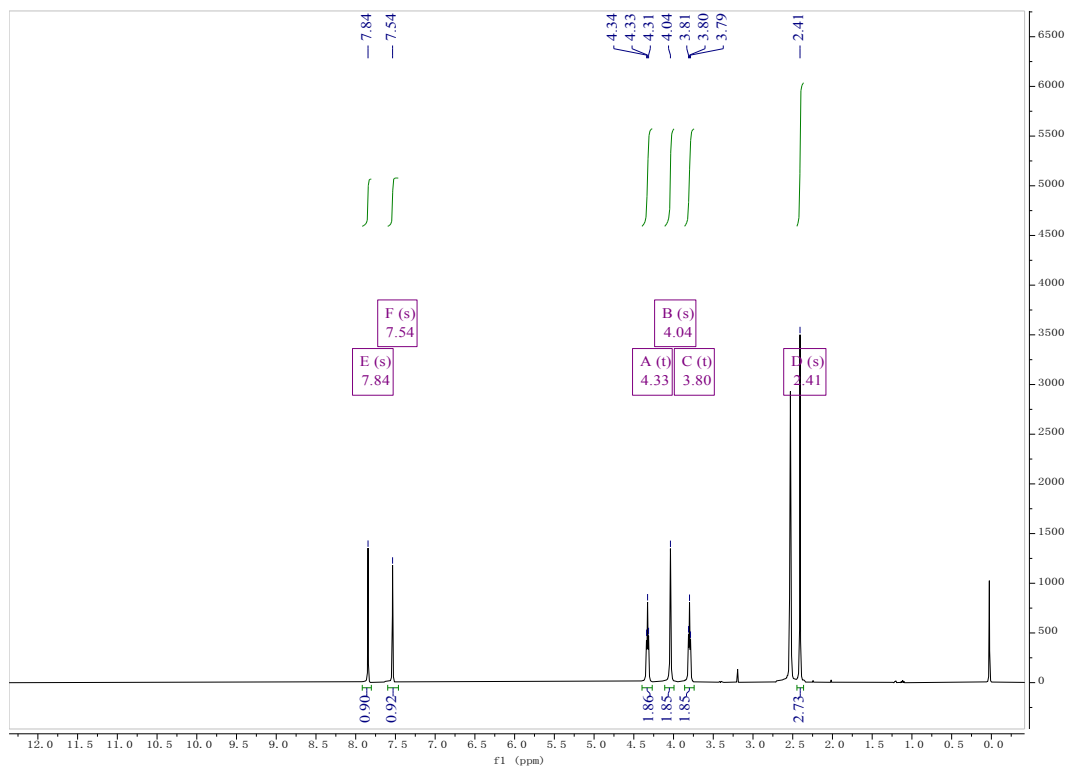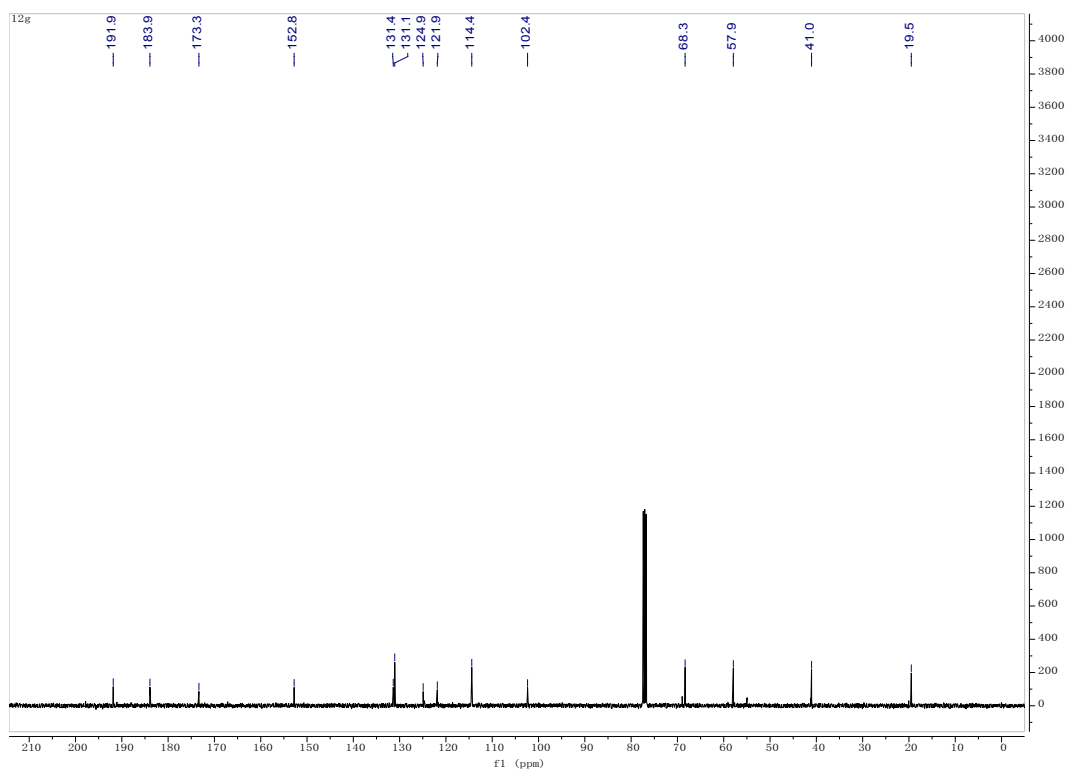

Spectrum from 06.wiff (sample 1) - Sample06, Experiment 1, +TOF MS (80 - 800) from 0.068 to 0.078 min

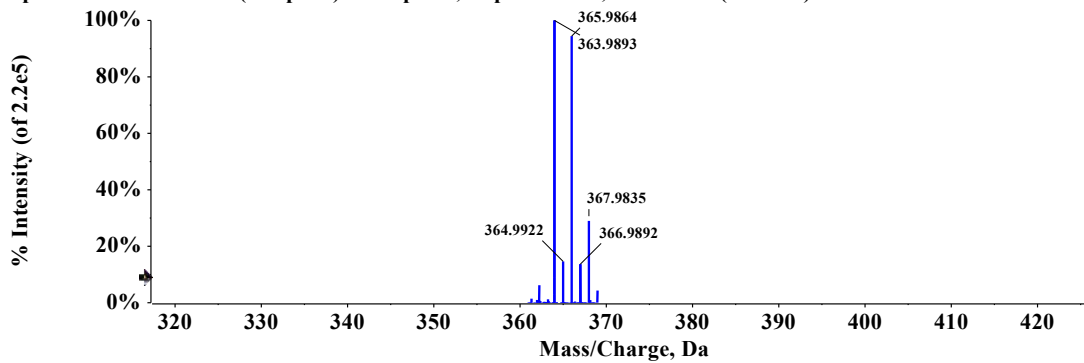

Compound 10h:

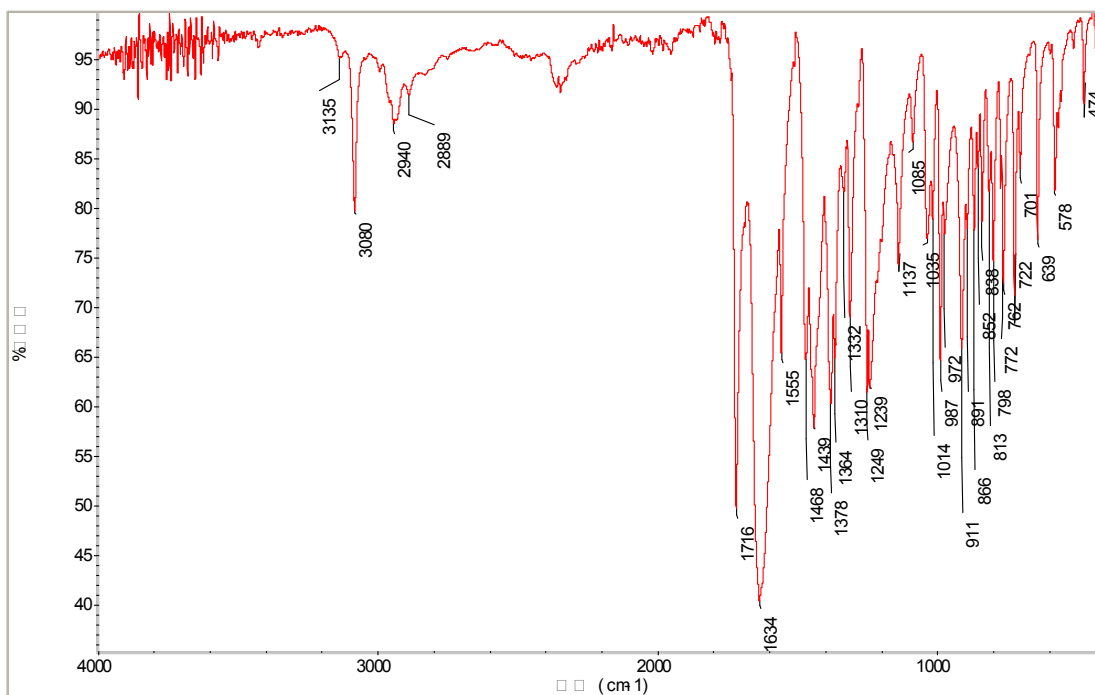

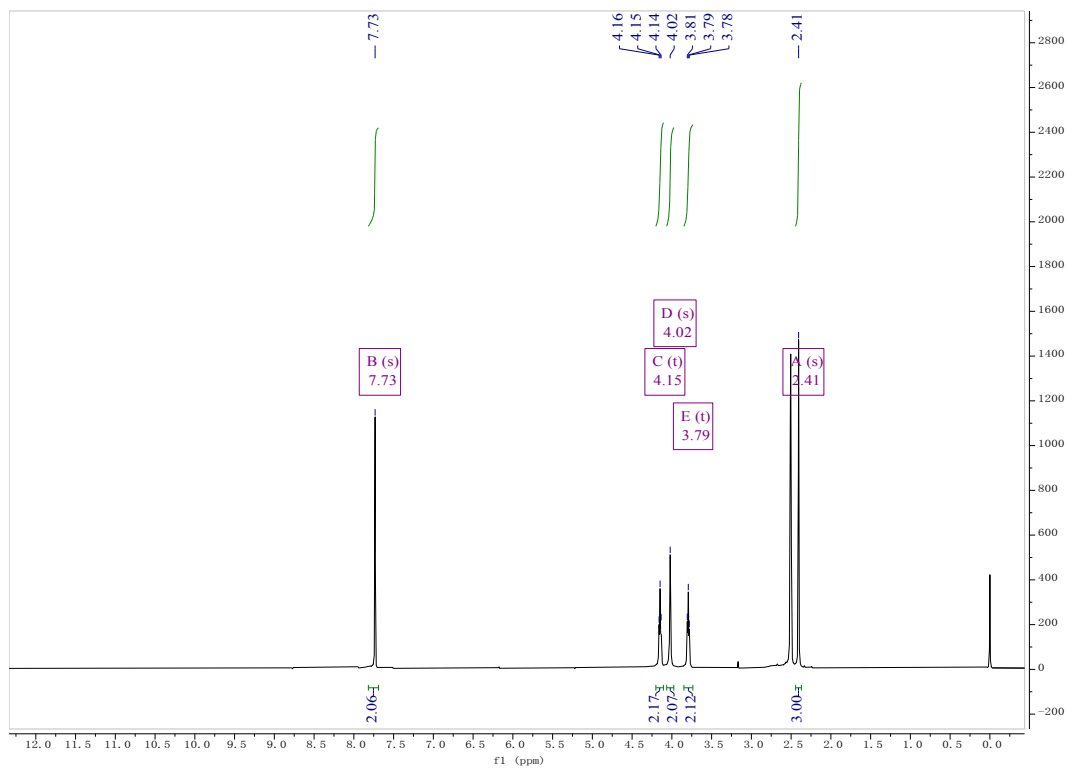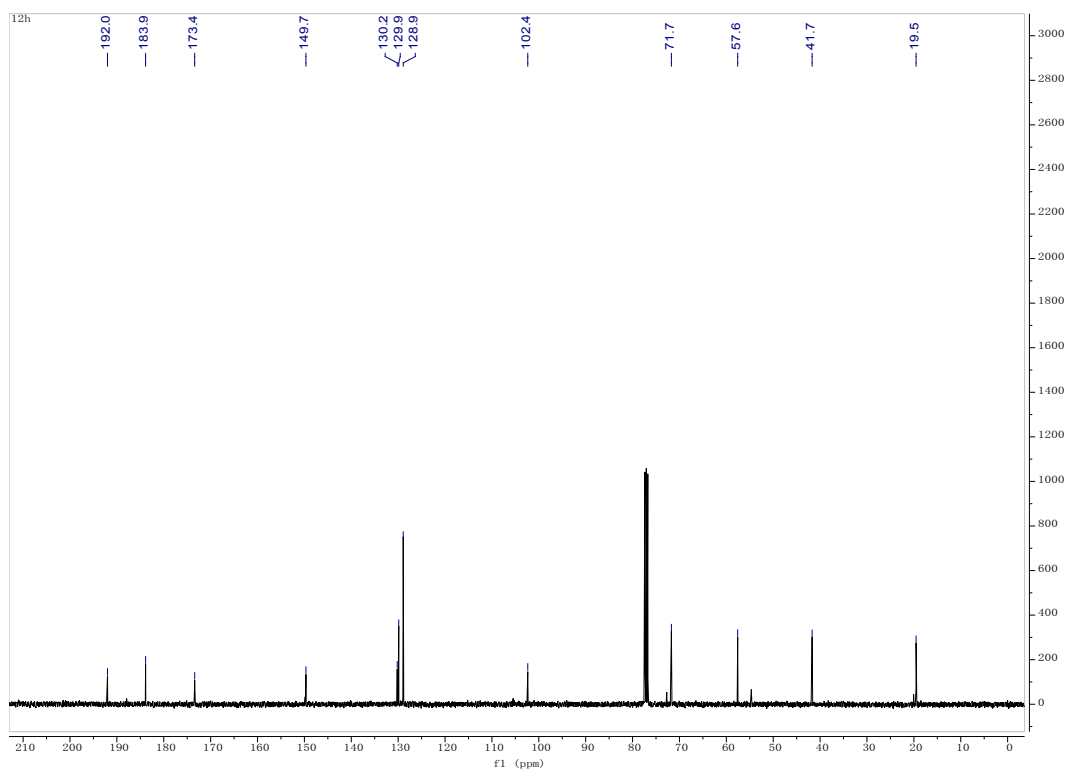



Spectrum from 05.wiff (sample 1) - Sample05, Experiment 1, +TOF MS (80 - 800) from 0.087 to 0.096 min

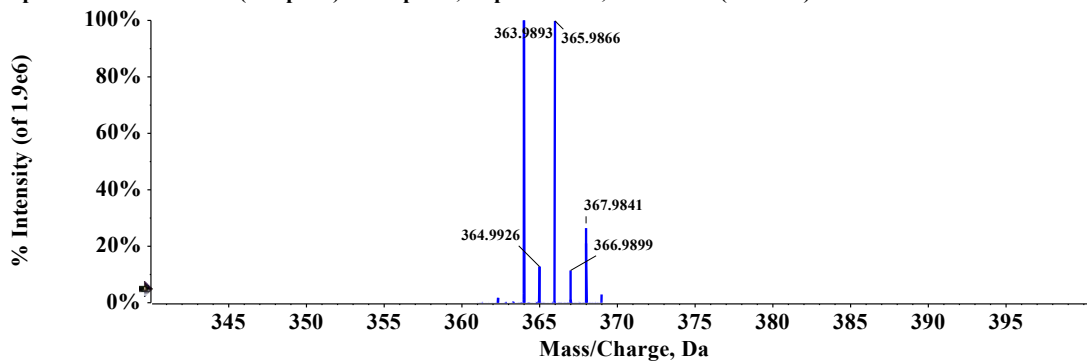

Compound 10i:

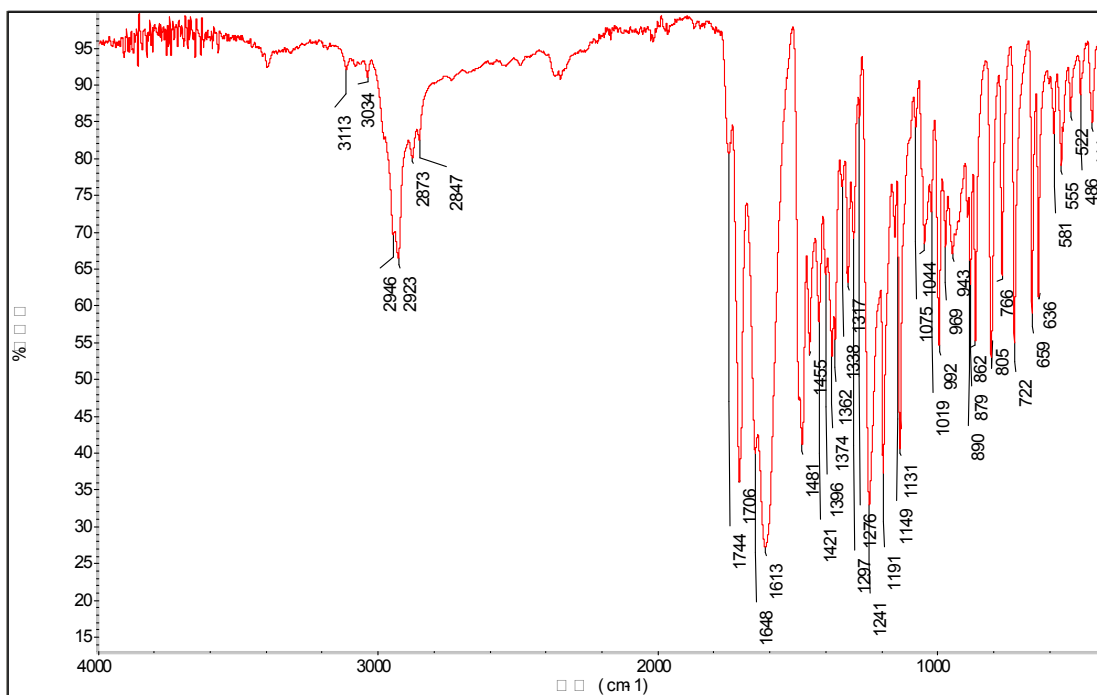

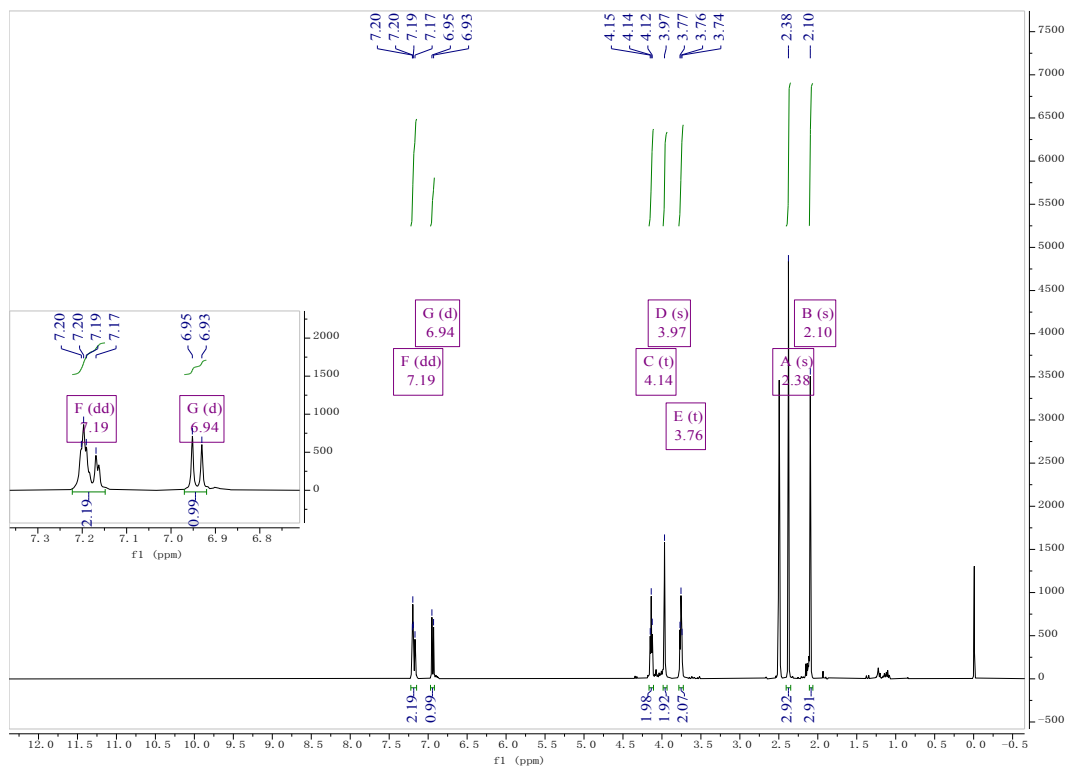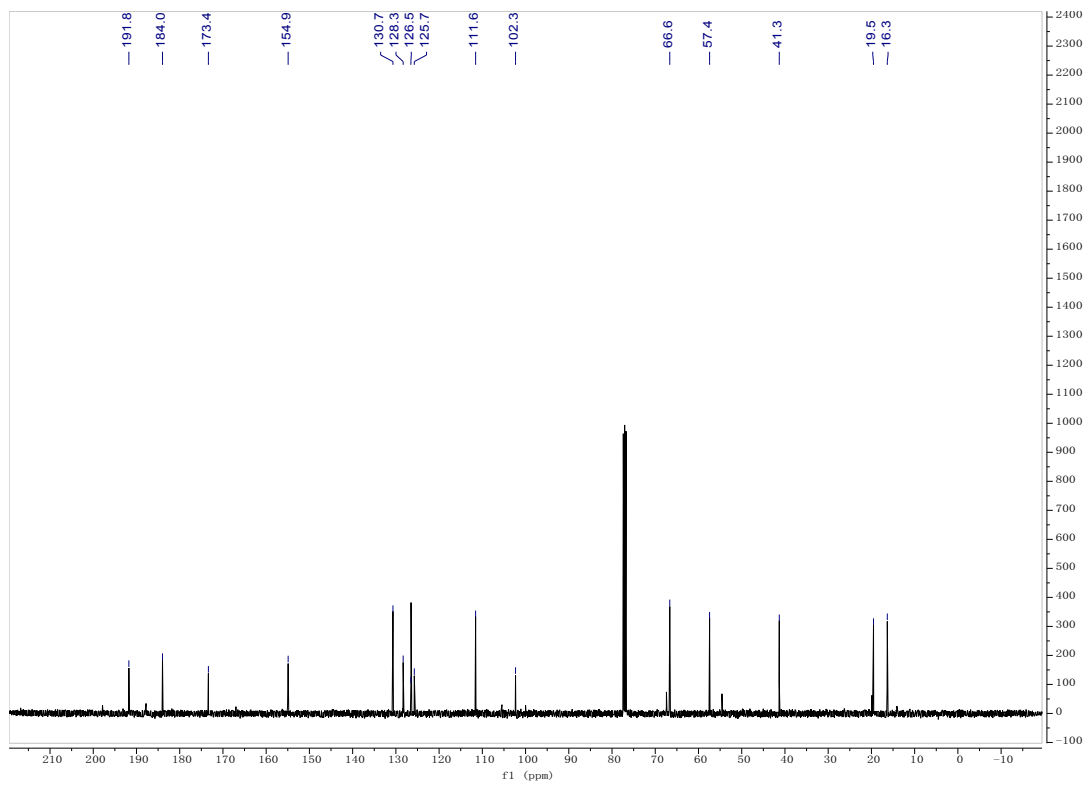

Spectrum from 10.wiff (sample 1) - Sample10, Experiment 1, +TOF MS (80 - 1000) from 0.077 to 0.086 min

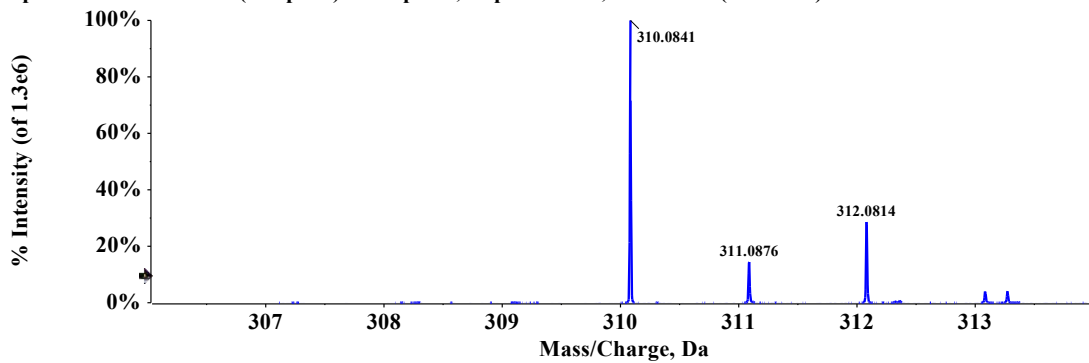

Compound 10j:

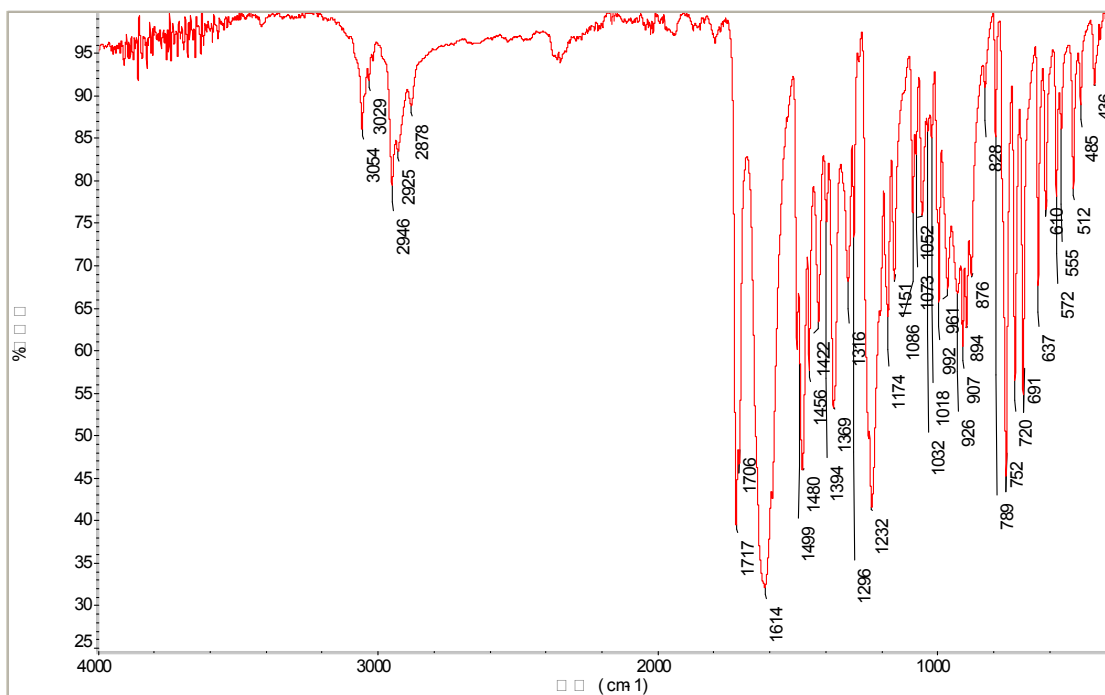

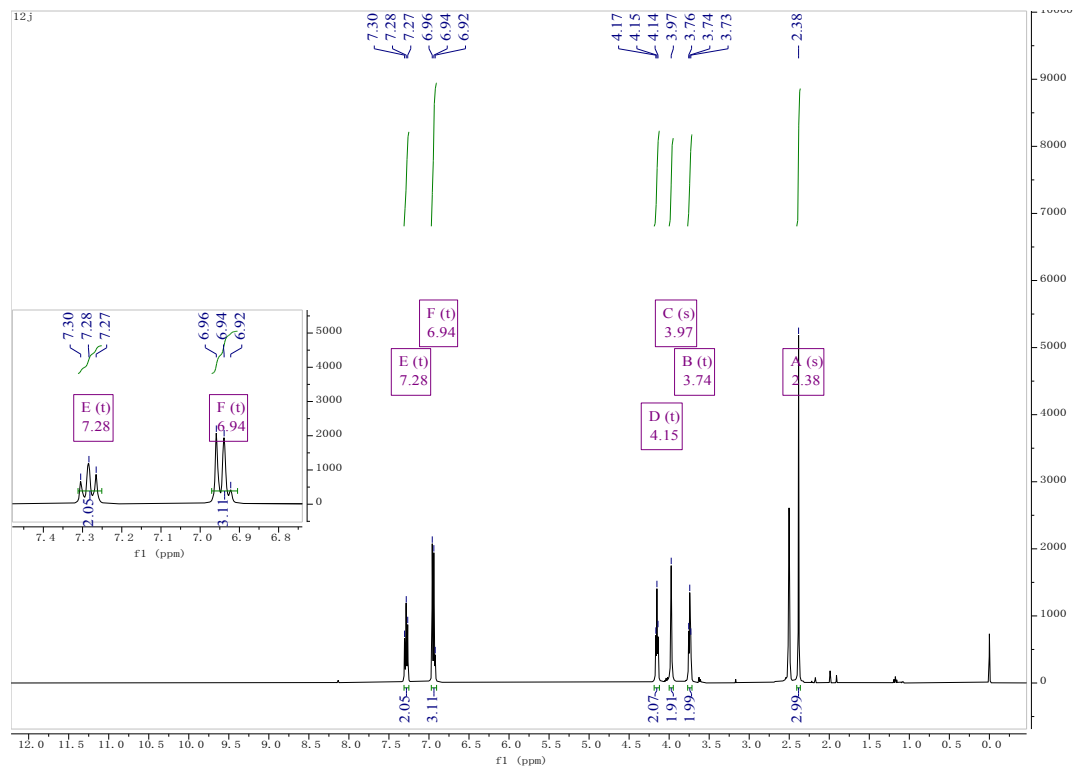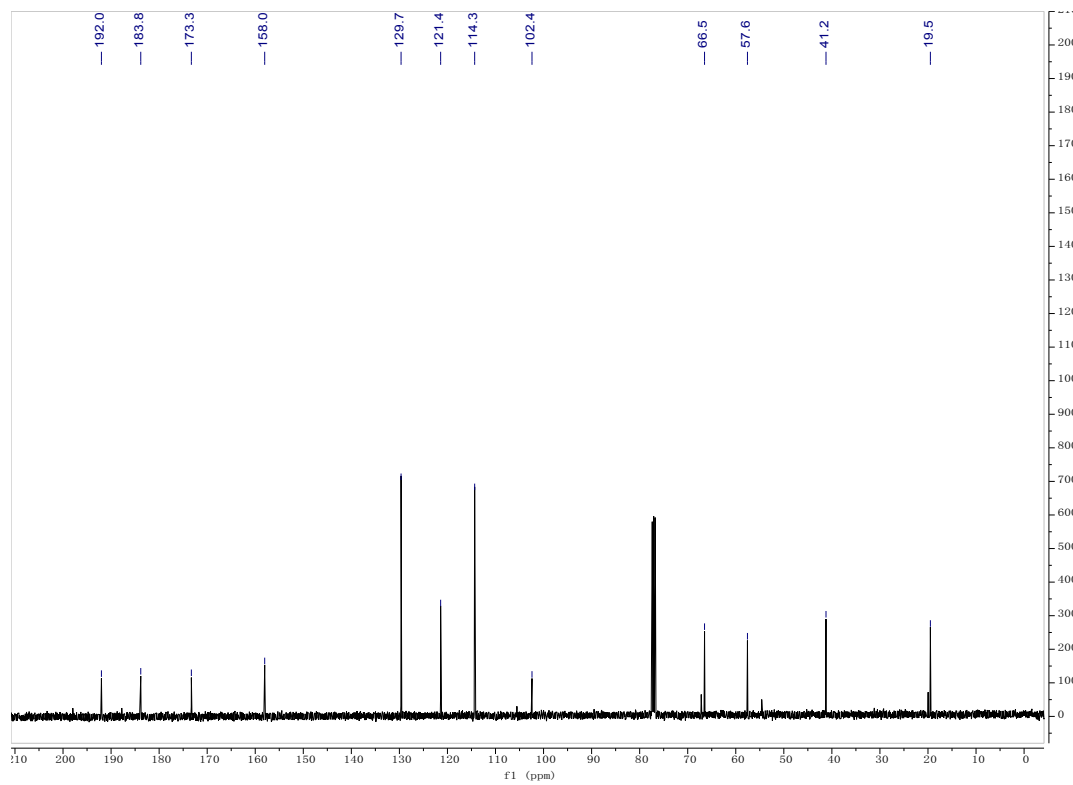

Spectrum from 01.wiff (sample 1) - Sample01, Experiment 1, +TOF MS (80 - 1000) from 0.077 to 0.086 min

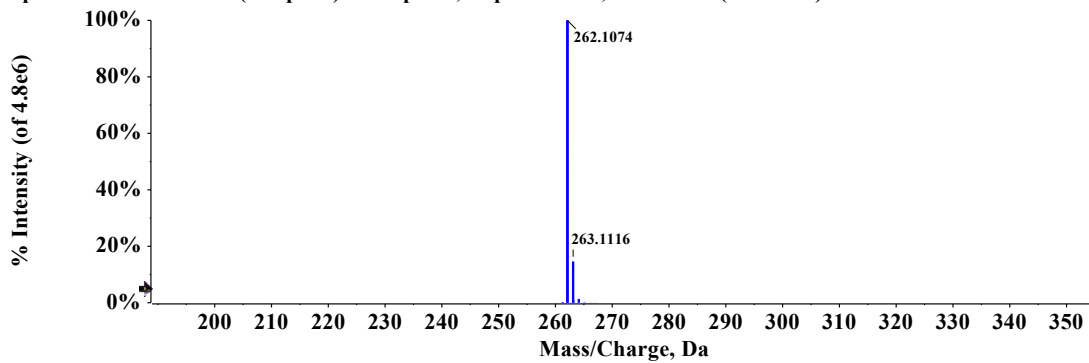

Compound 10k:

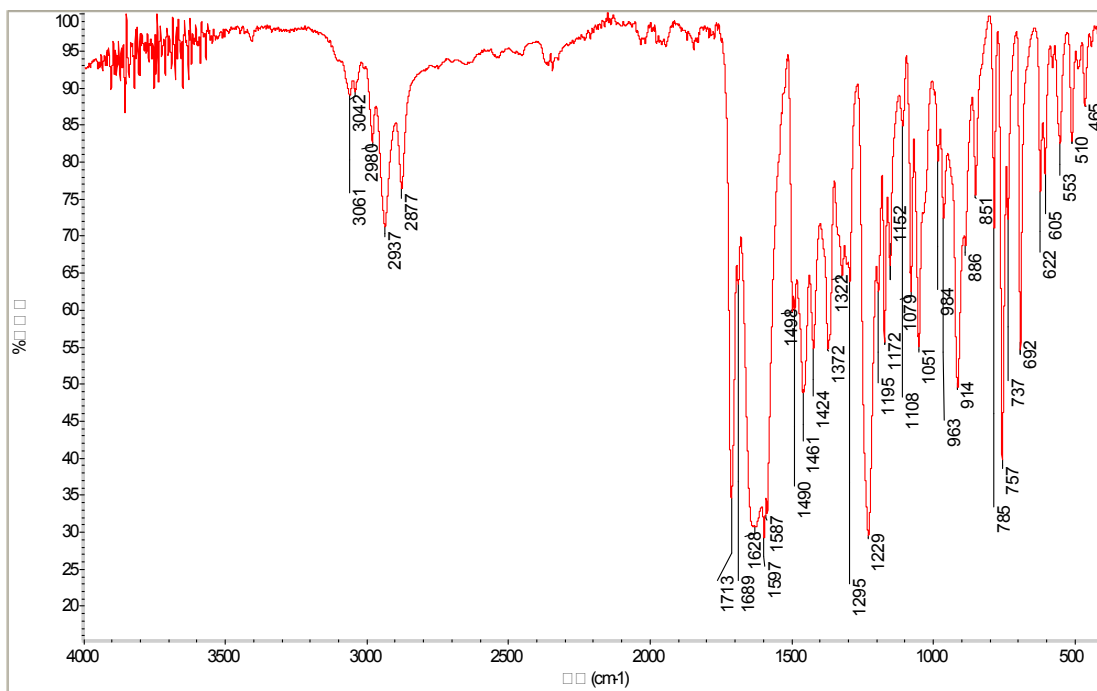

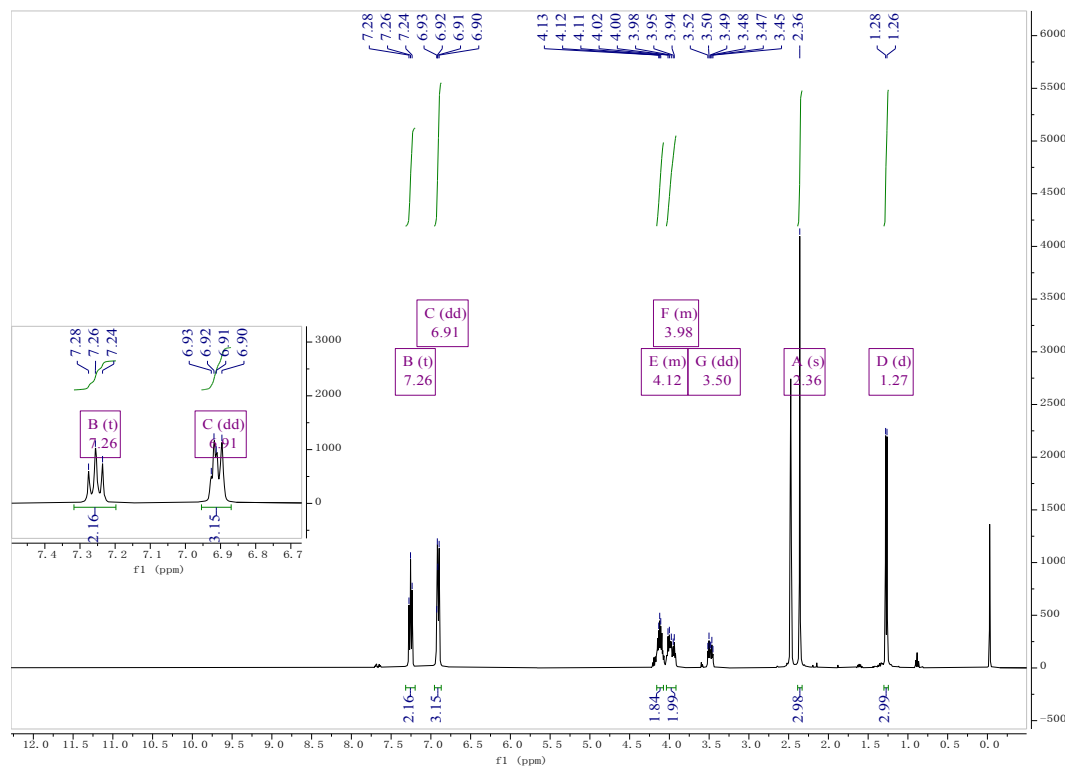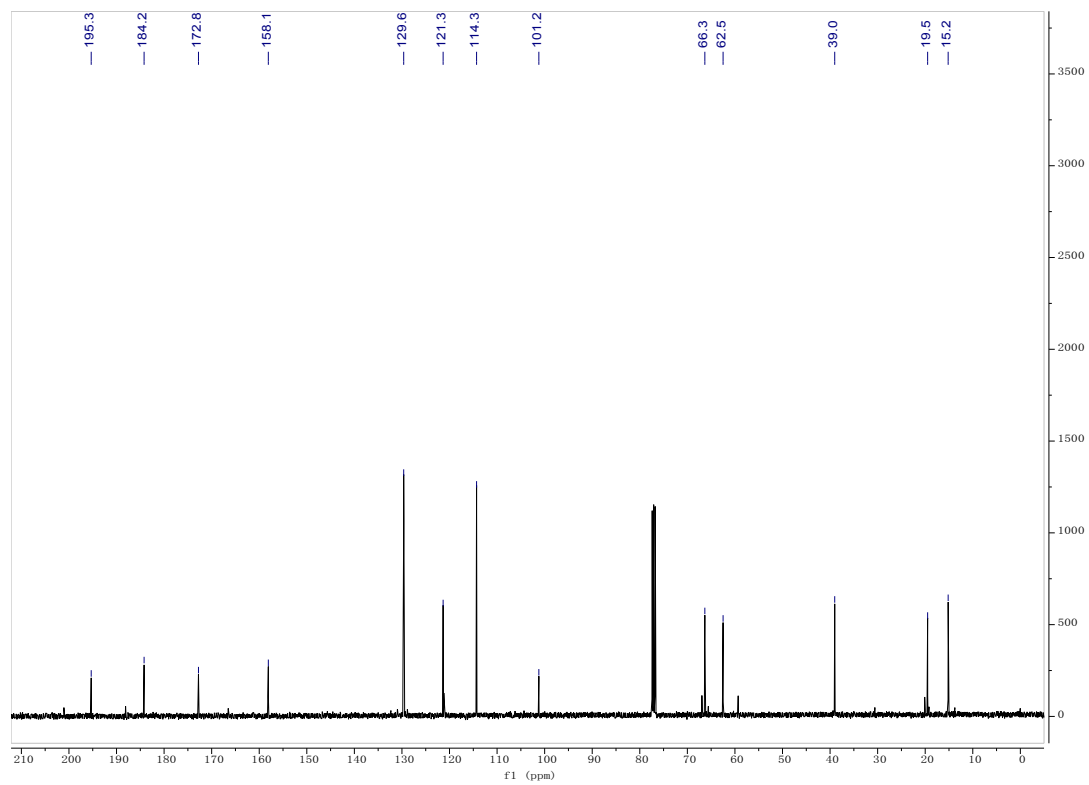

Spectrum from 02.wiff (sample 1) - Sample02, Experiment 1, +TOF MS (80 - 1000) from 0.086 to 0.095 min

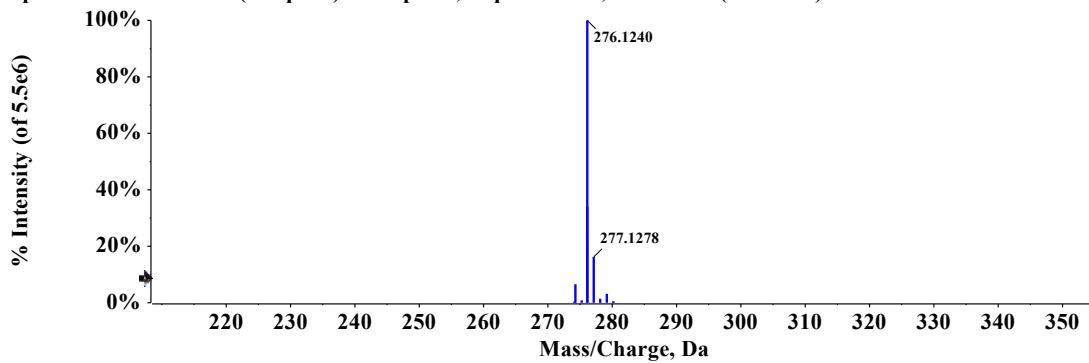

Compound 101:

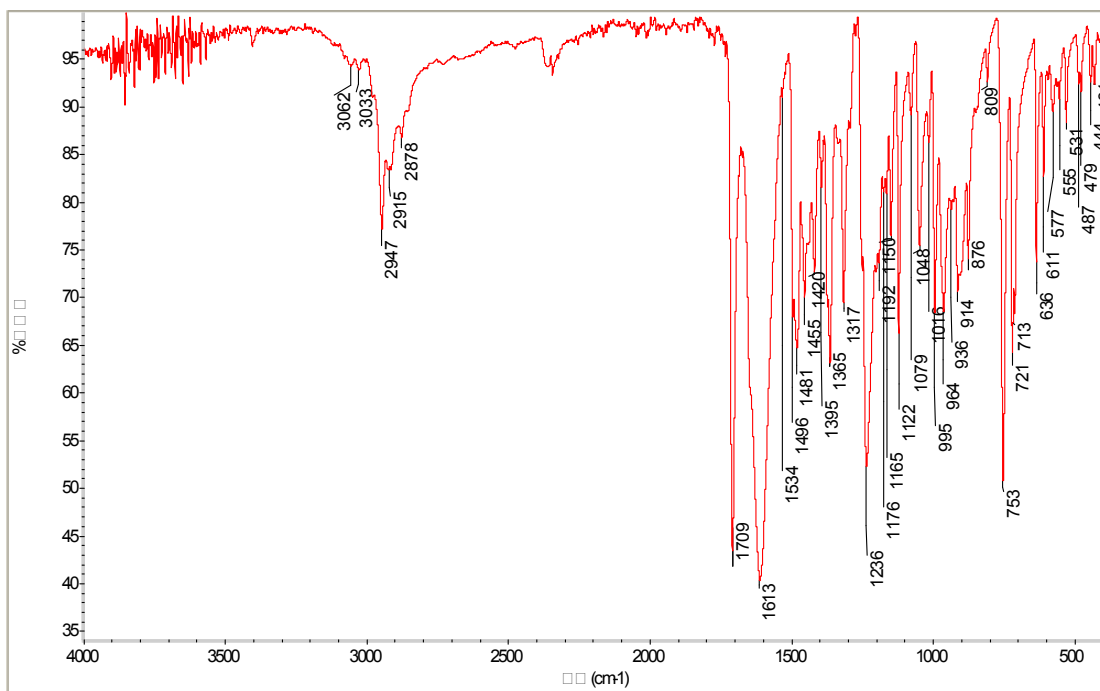

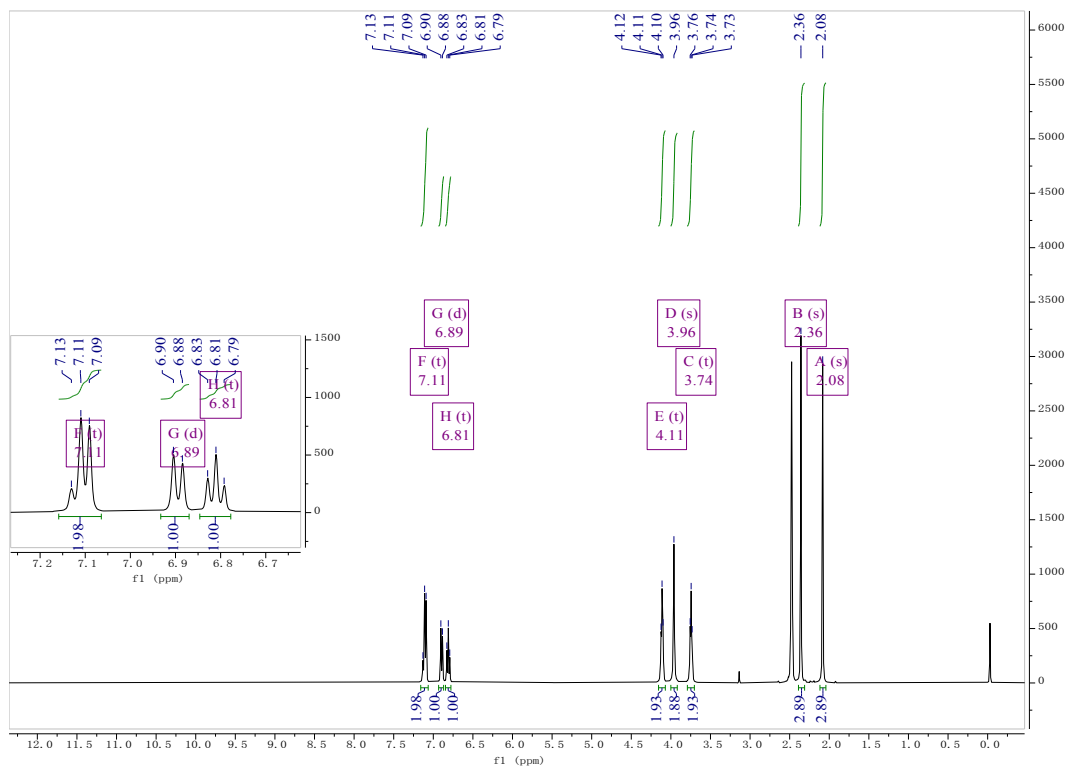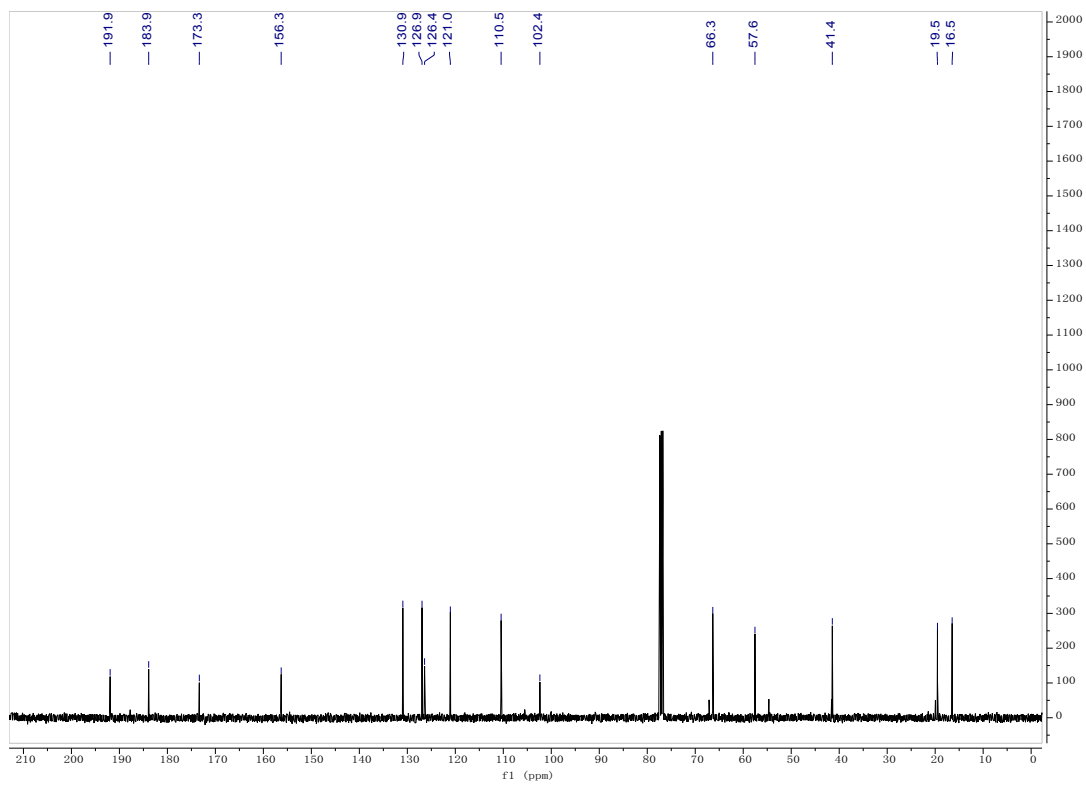



Spectrum from 09.wiff (sample 1) - Sample09, Experiment 1, +TOF MS (80 - 800) from 0.086 to 0.095 min

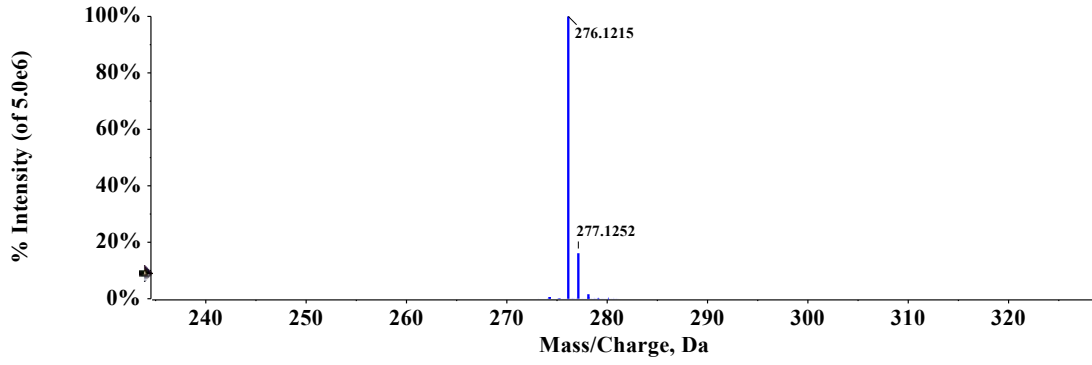

Compound 10m:

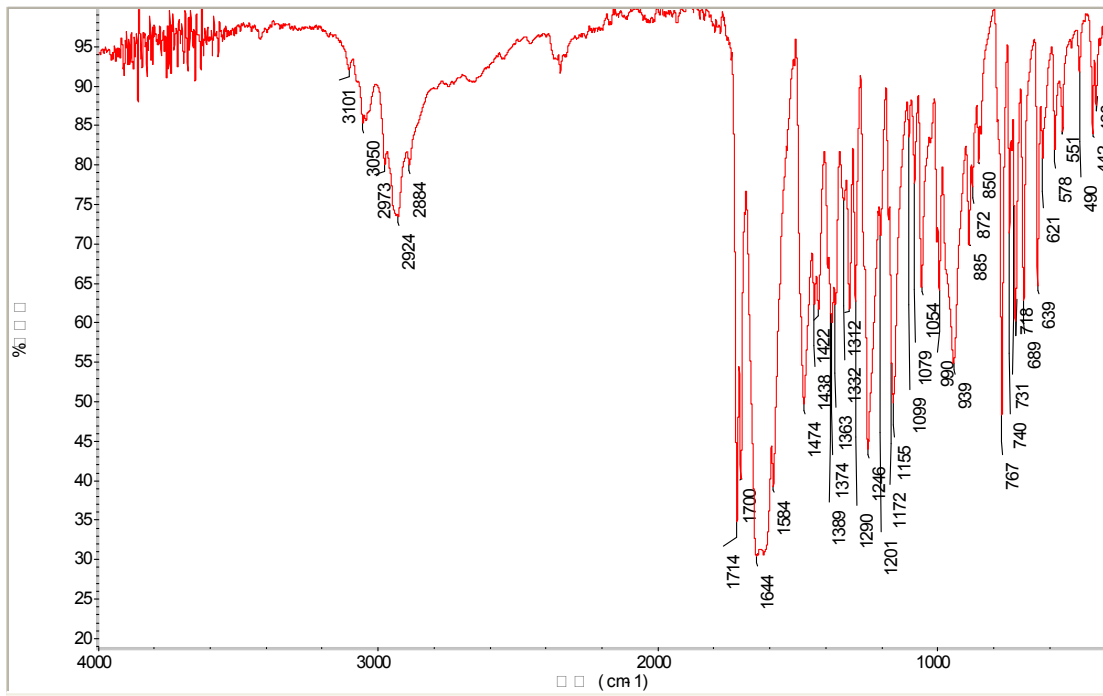

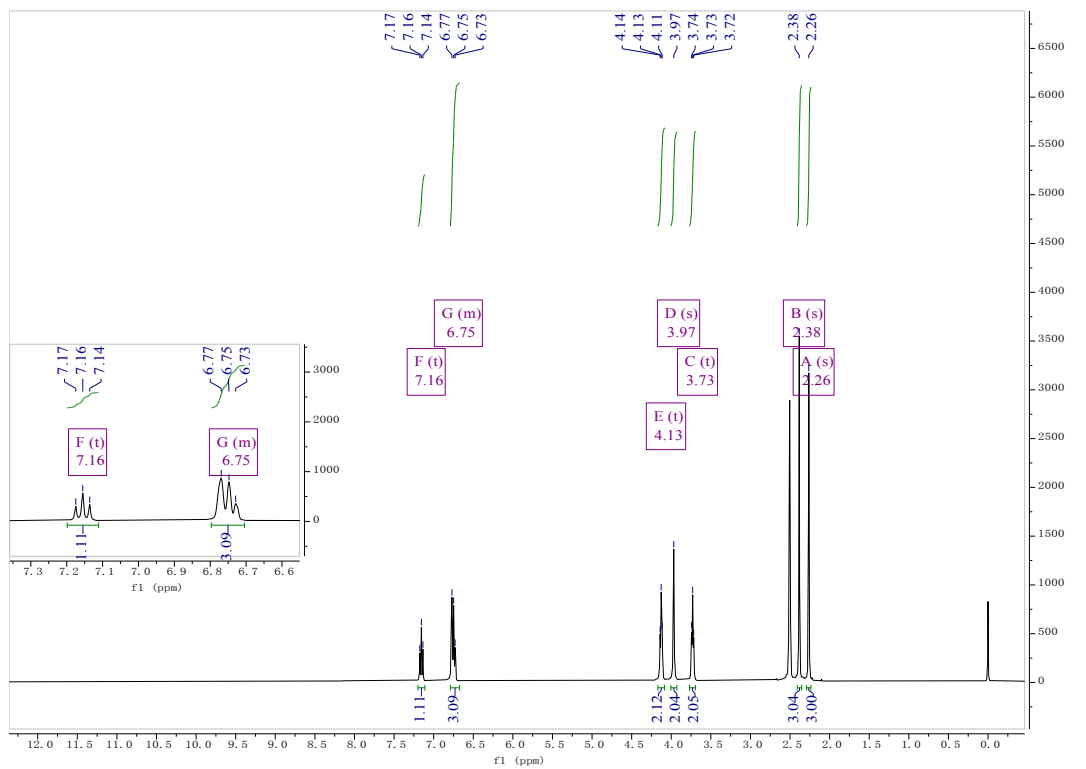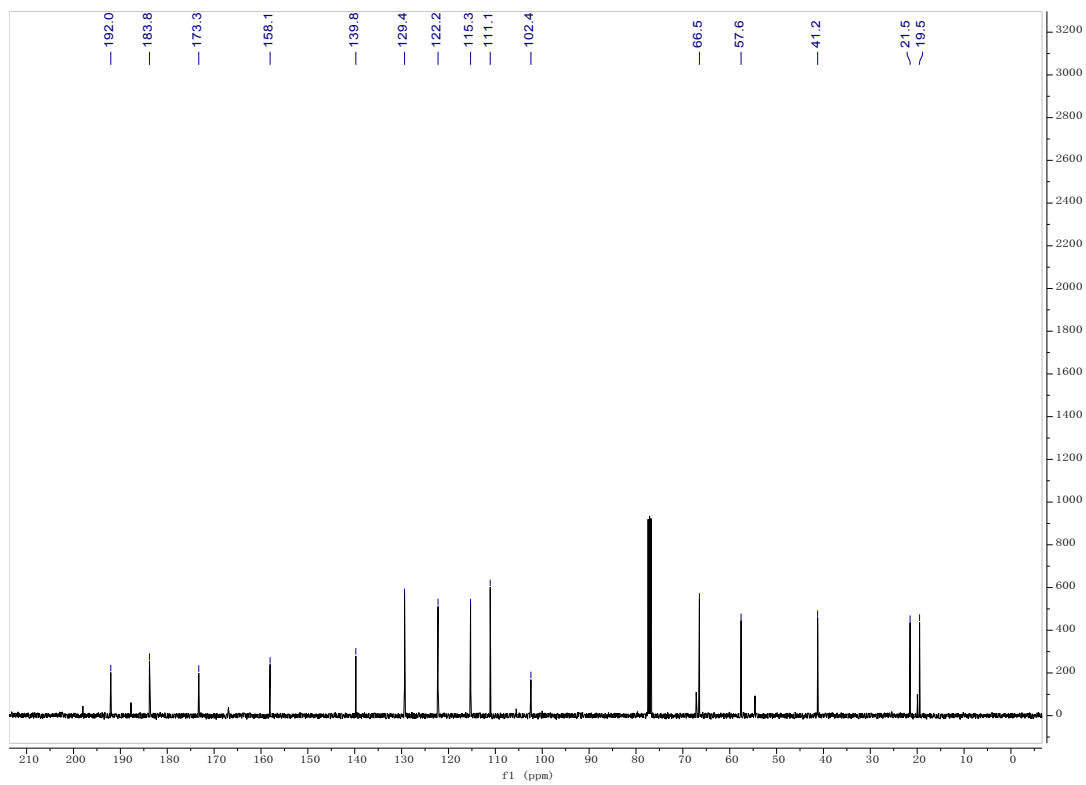

Spectrum from 28.wiff (sample 1) - Sample28, Experiment 1, +TOF MS (80 - 800) from 0.095 to 0.119 min

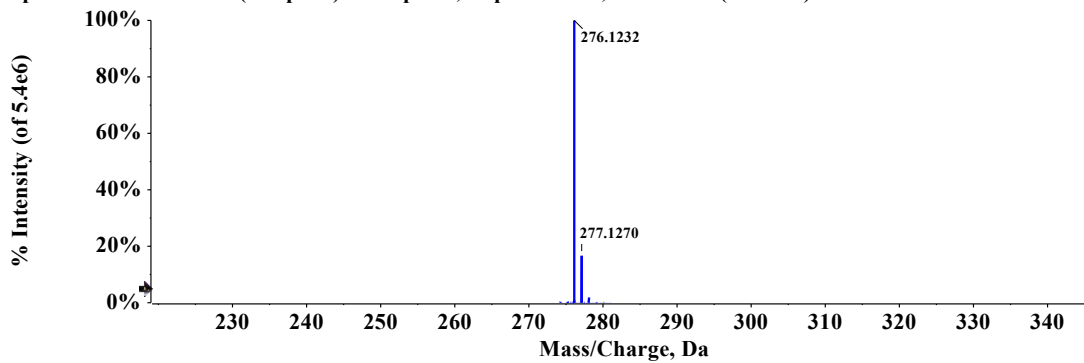

Compound 10n:

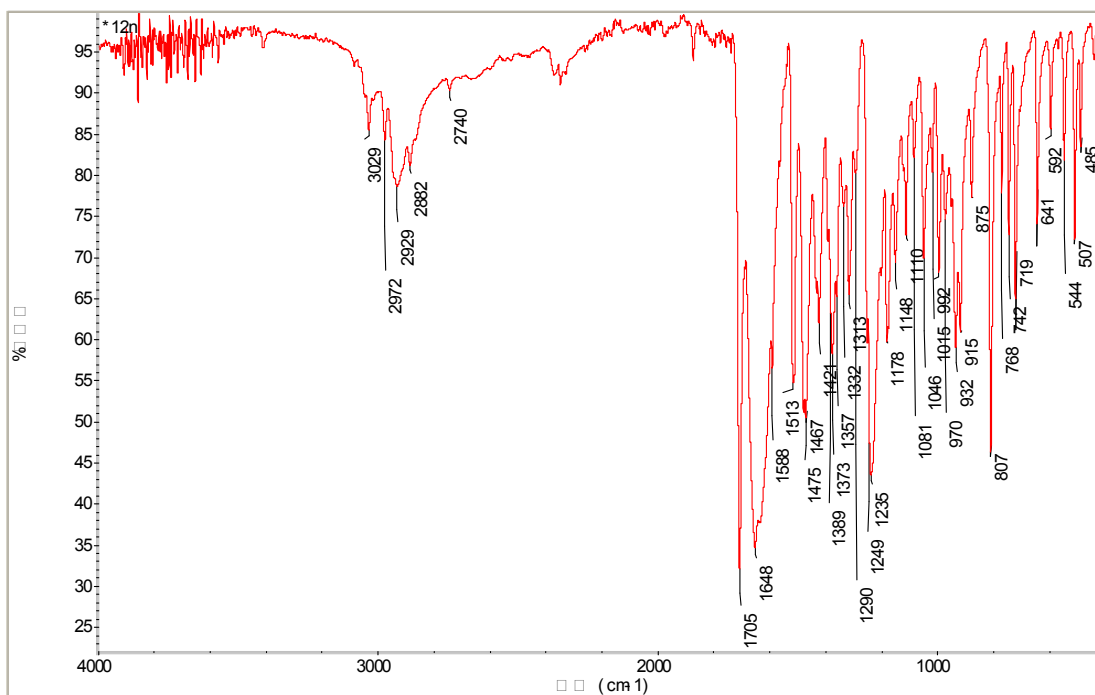

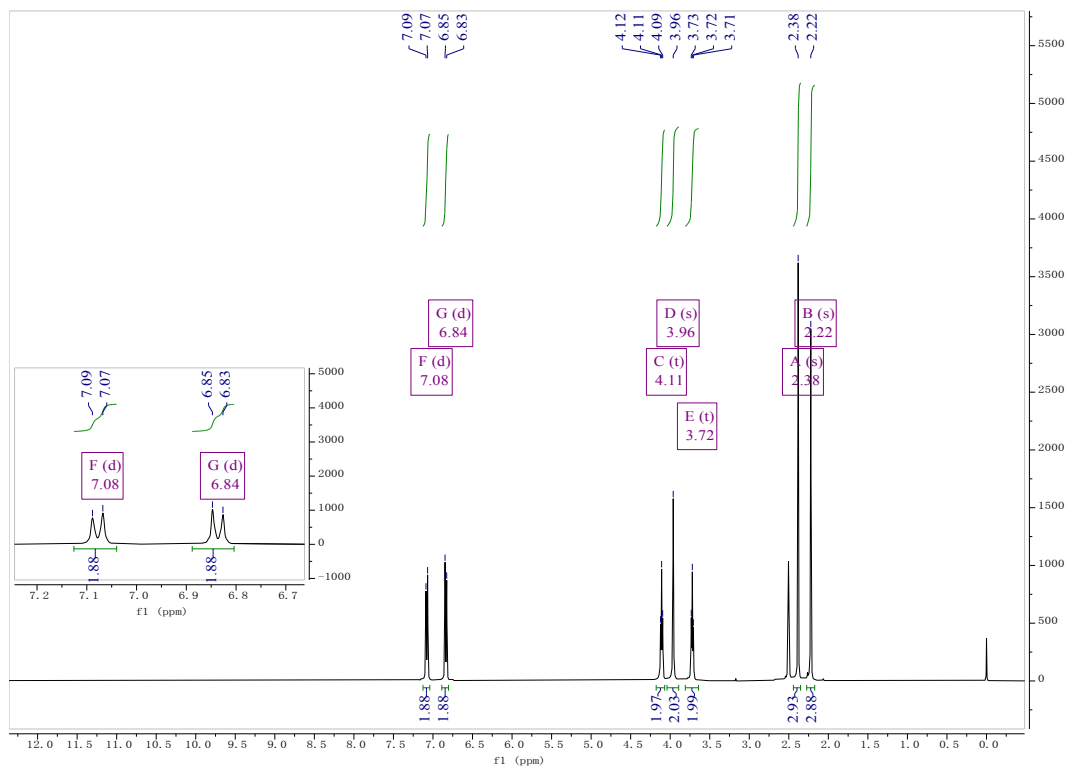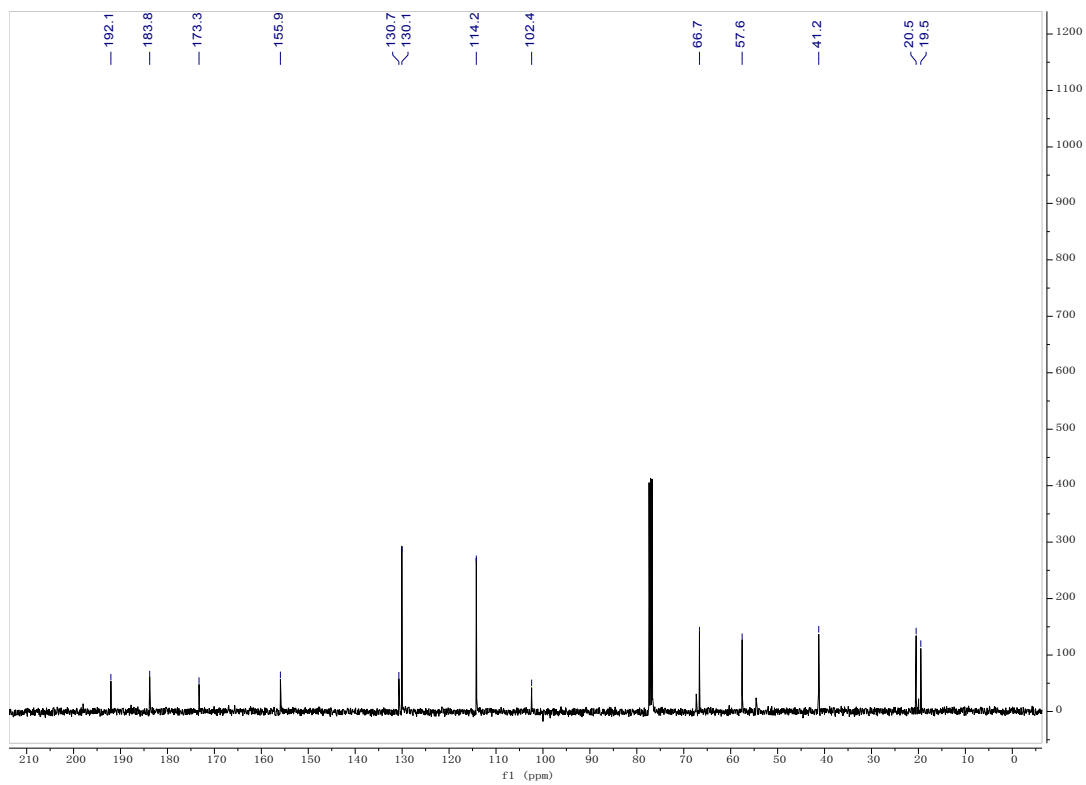

Spectrum from 03.wiff (sample 1) - Sample03, Experiment 1, +TOF MS (80 - 800) from 0.077 to 0.086 min

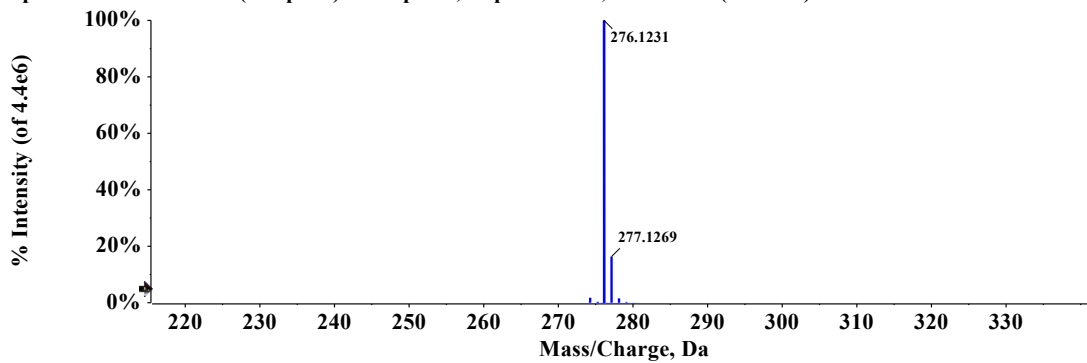

Compound 10o:

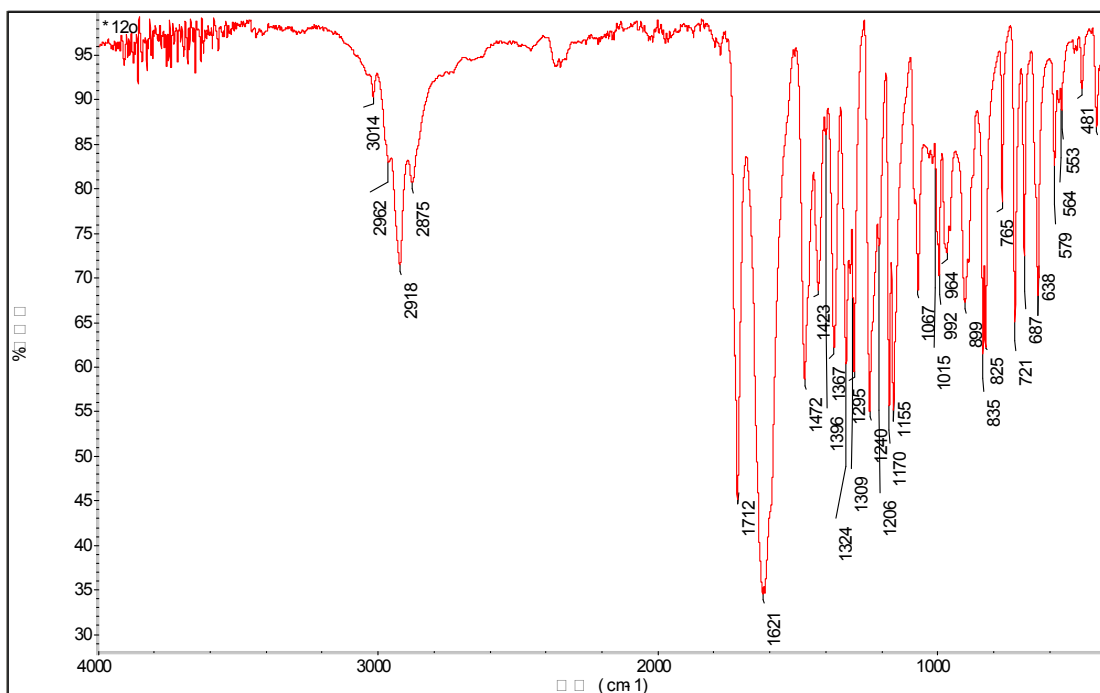

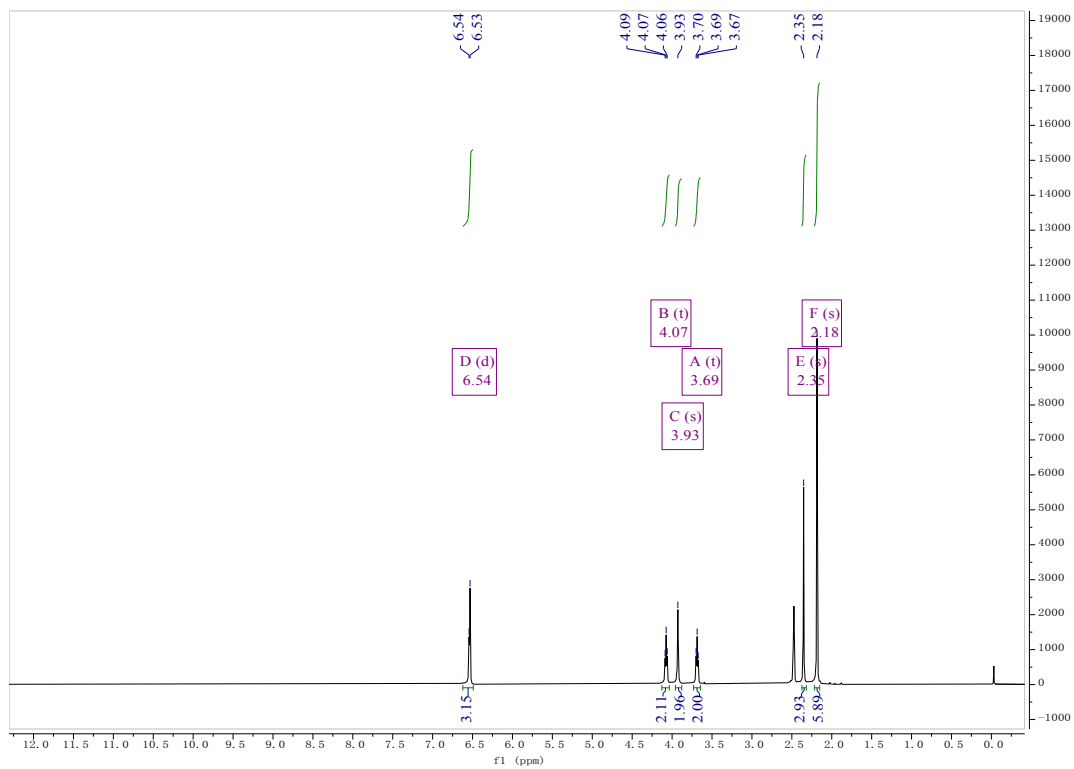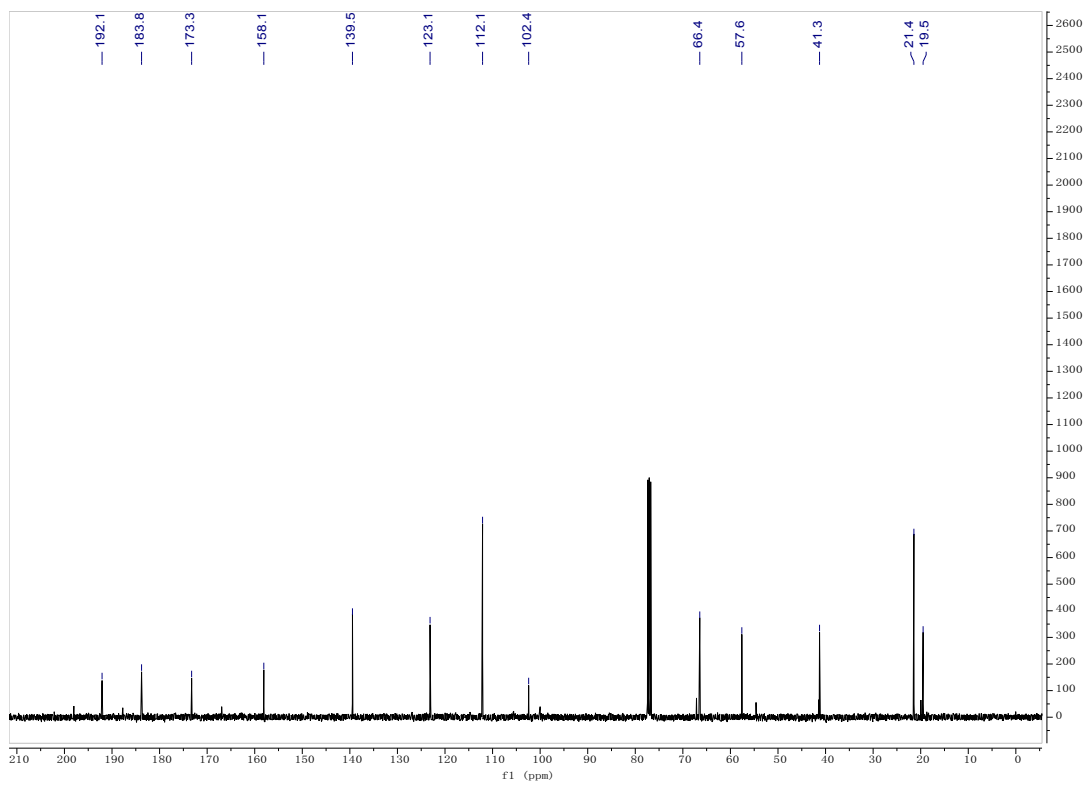

Spectrum from 29.wiff (sample 1) - Sample29, Expe... added to (C16H19NO4 +H), added to (C16H19NO4 +H)

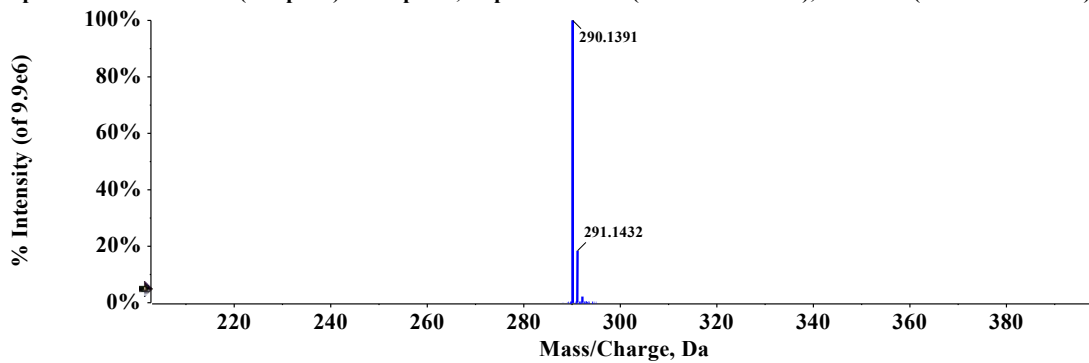

Compound 10p:

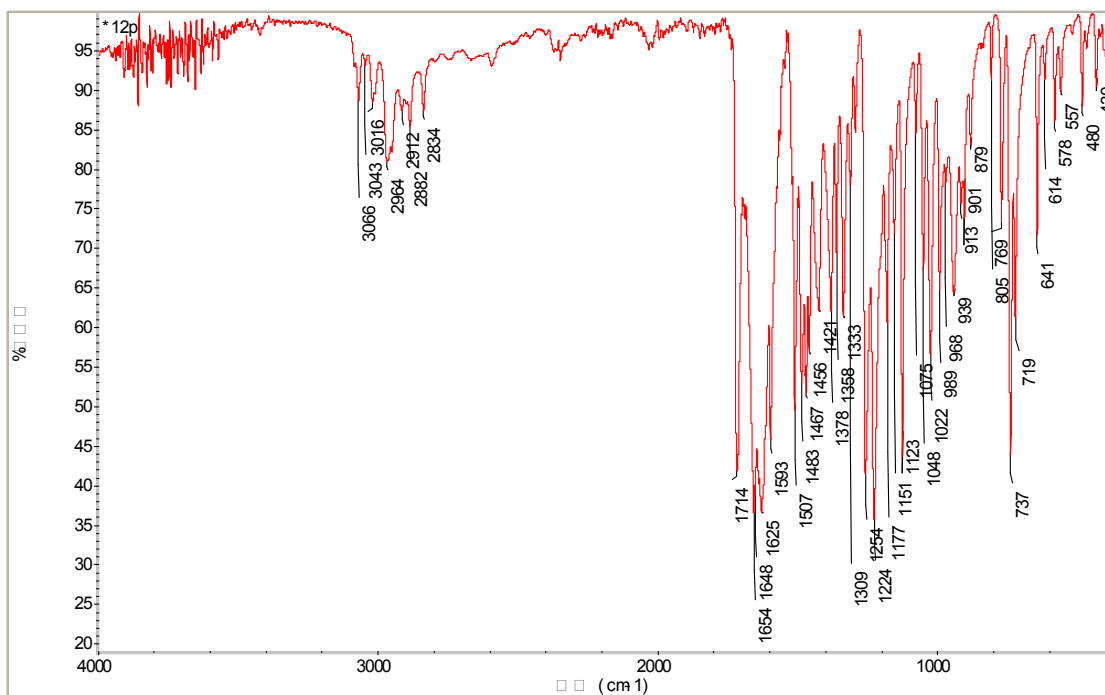

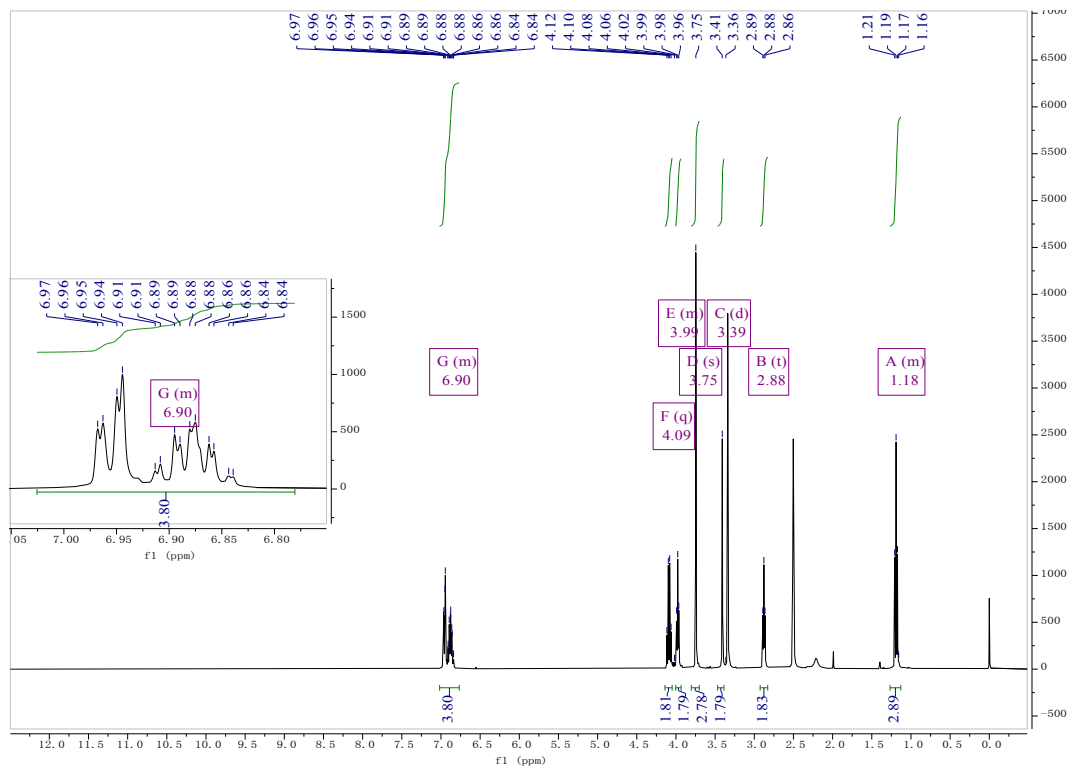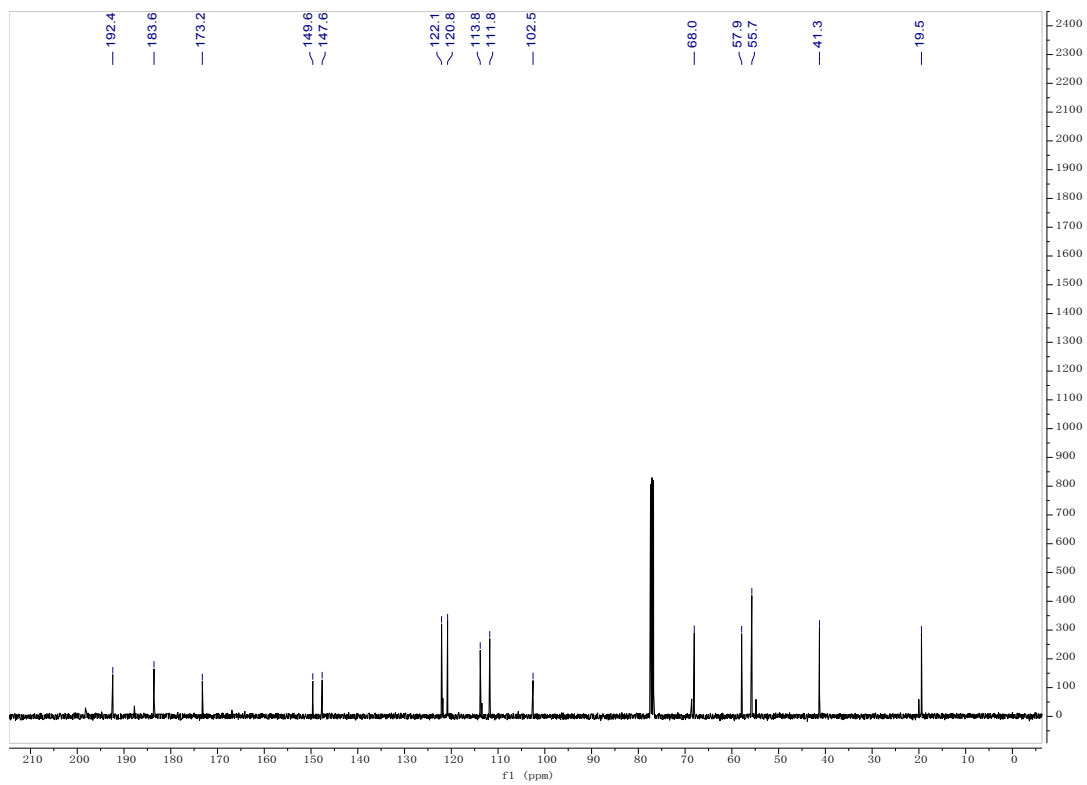



Spectrum from 03.wiff (sample 1) - Sample03, Experiment 1, +TOF MS (80 - 1000) from 0.064 to 0.074 min

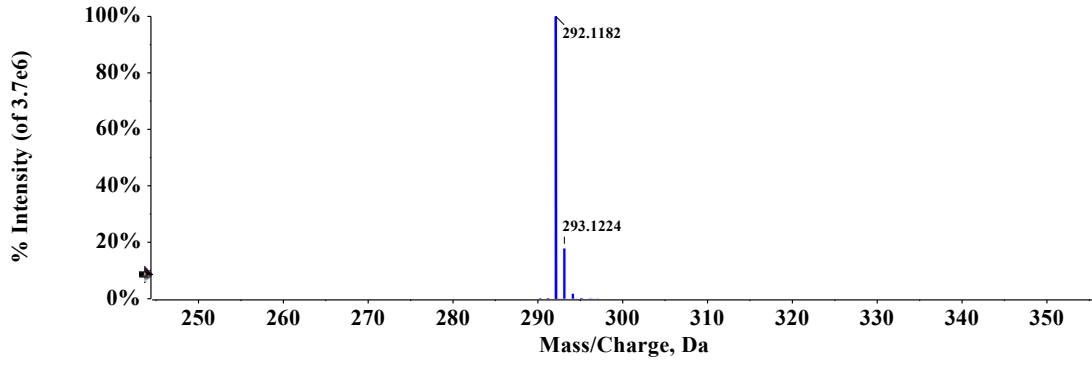

Compound 10q:

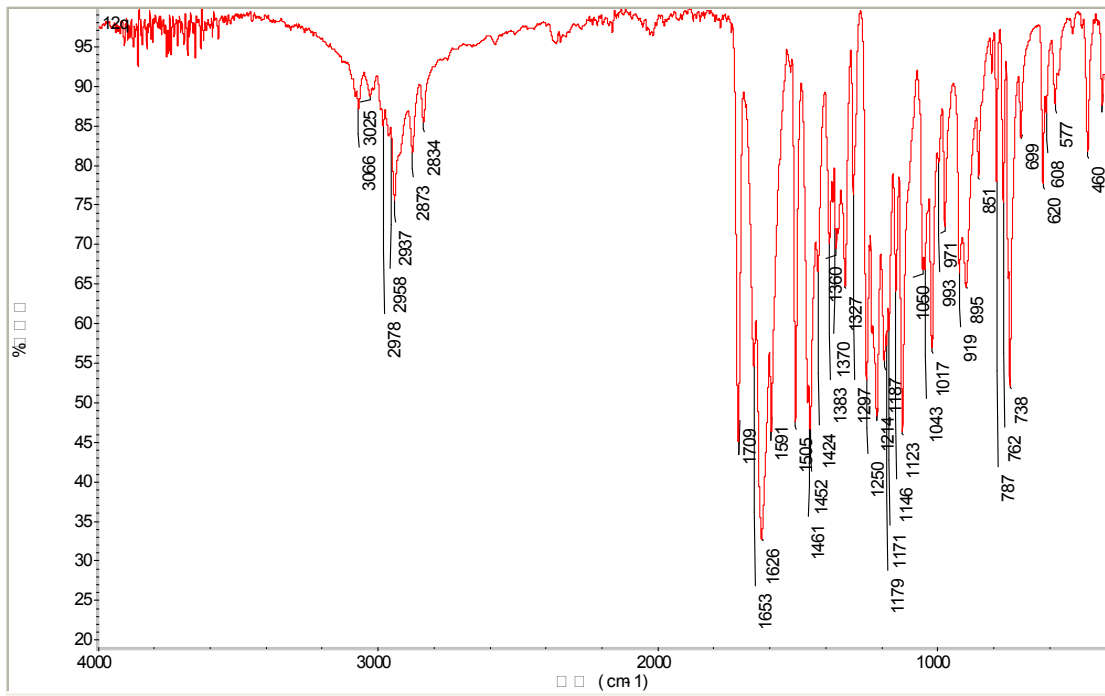

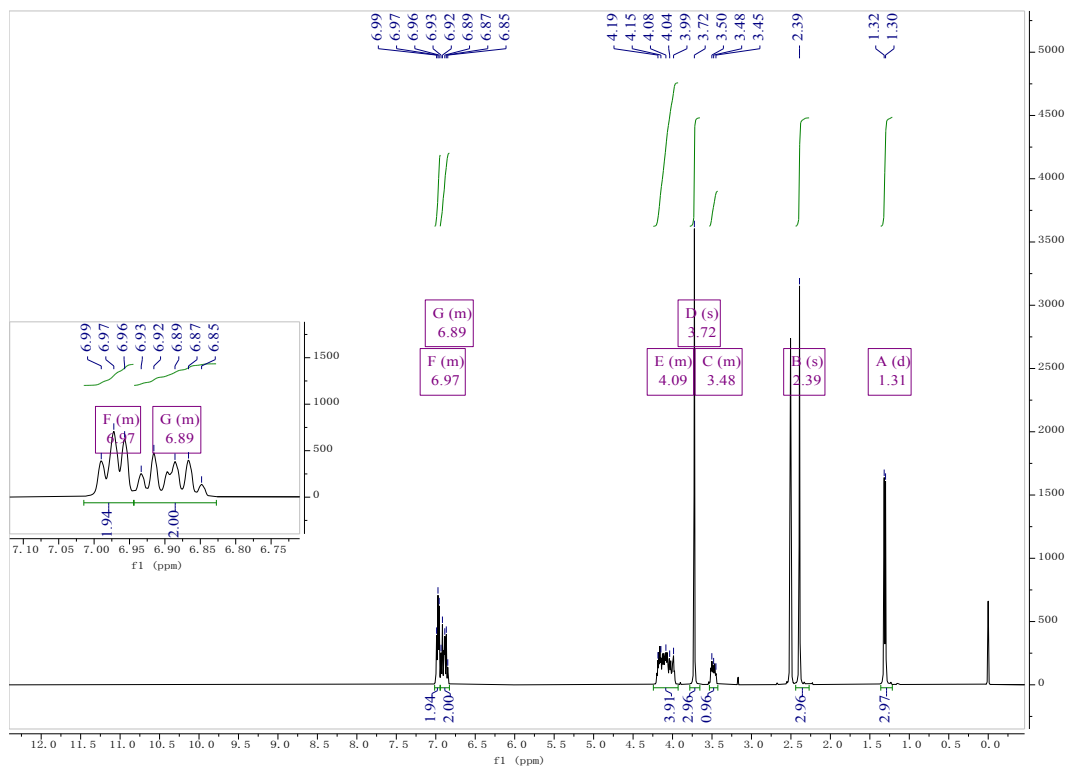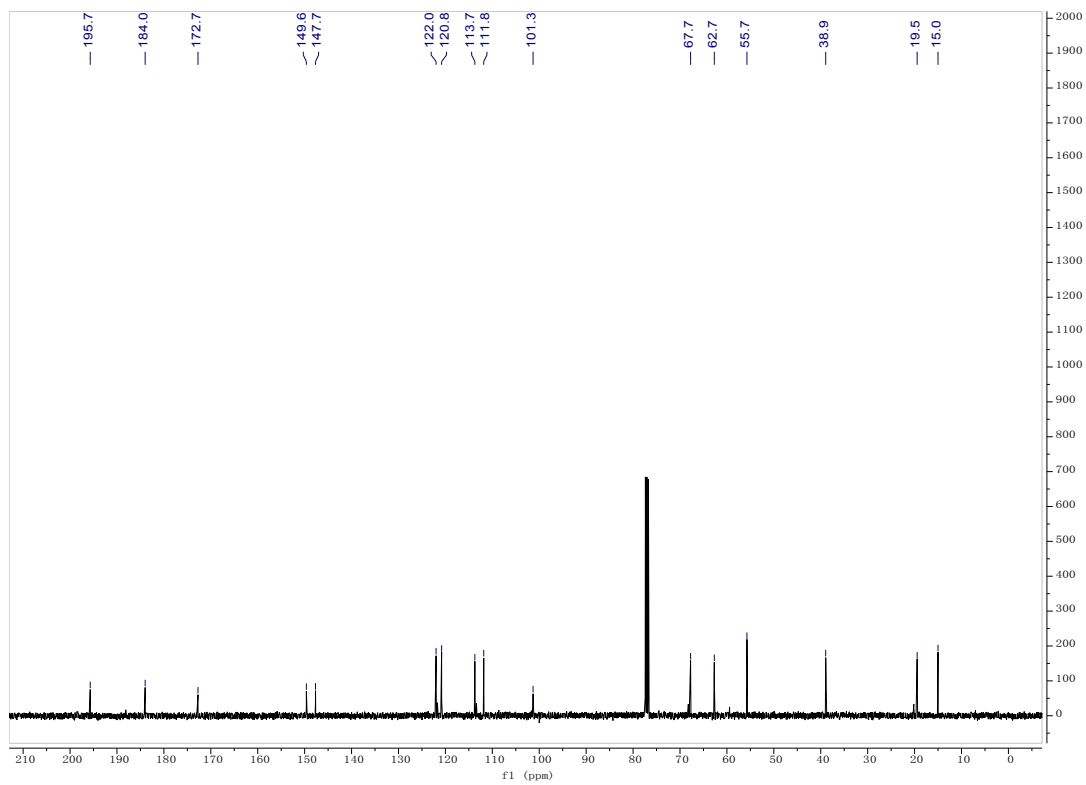

Spectrum from 04.wiff (sample 1) - Sample04, Experiment 1, +TOF MS (80 - 1000) from 0.064 to 0.073 min

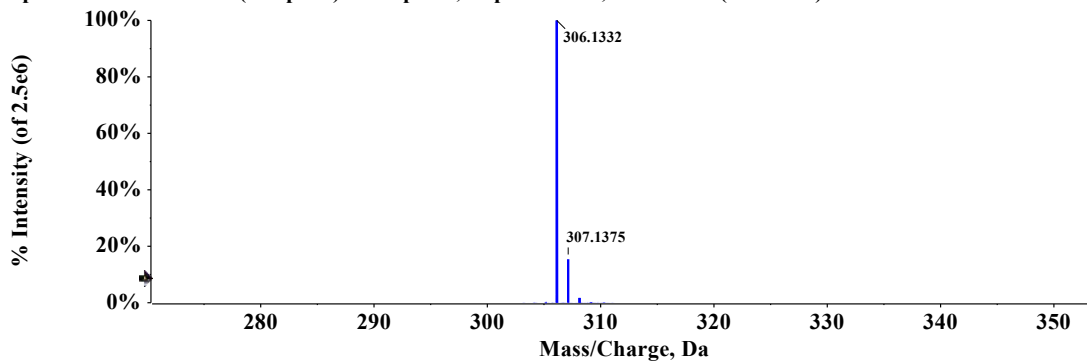

Compound 10r:

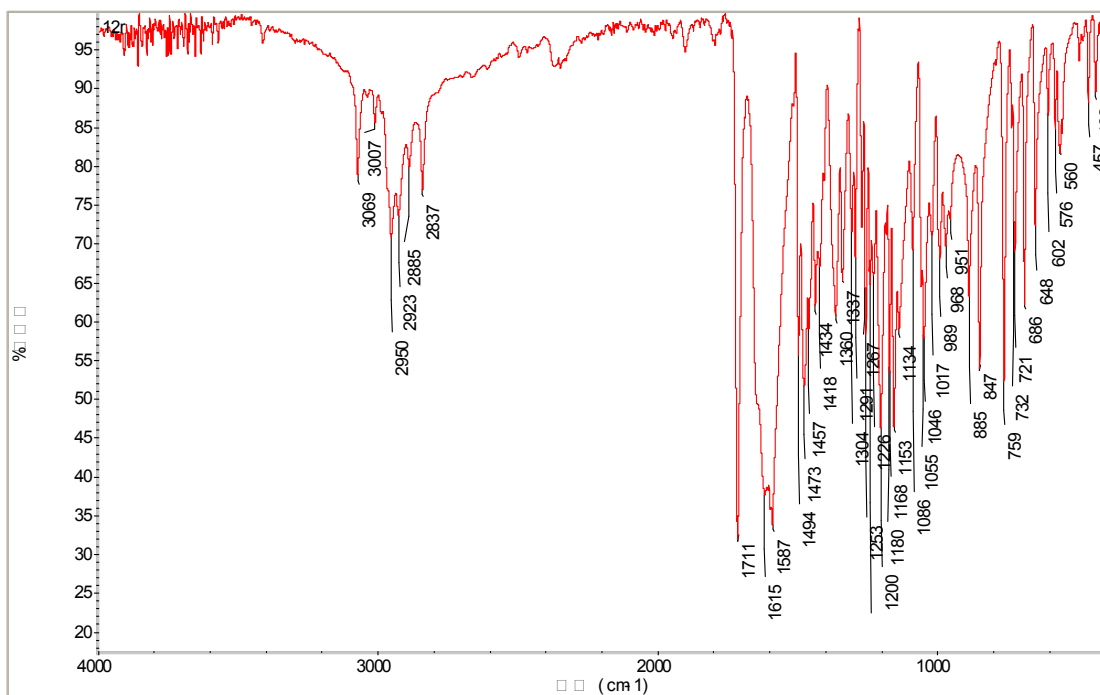

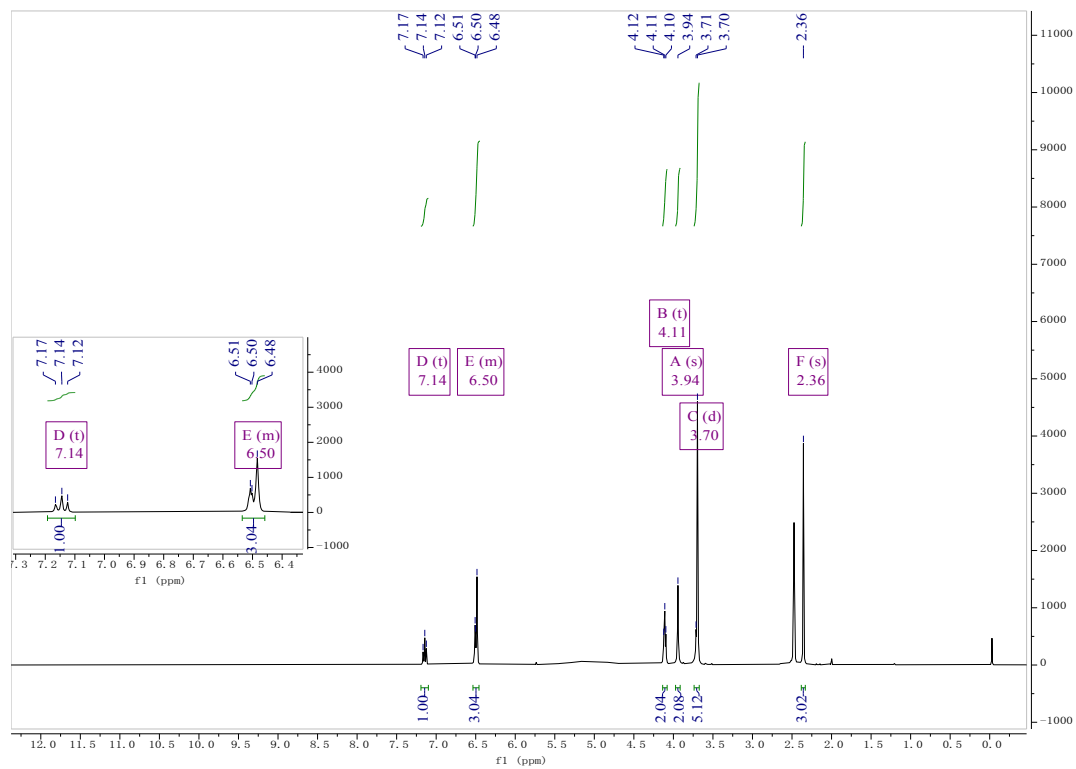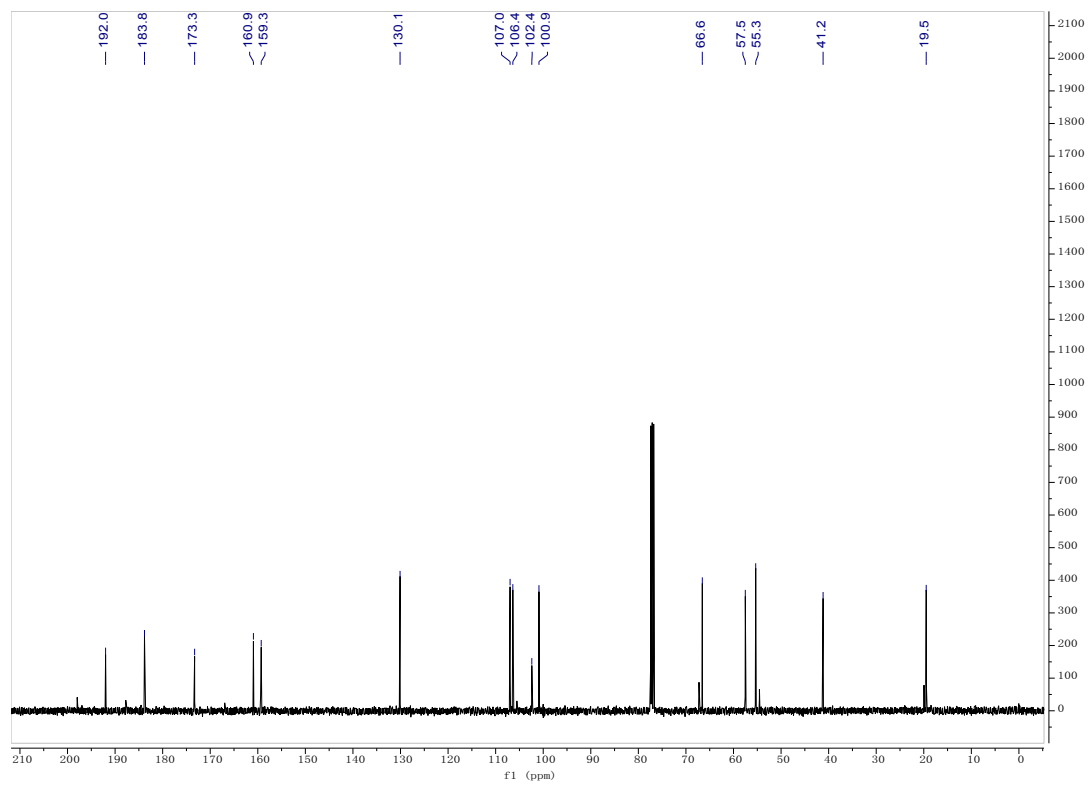

Spectrum from 30.wiff (sample 1) - Sample30, Experiment 1, +TOF MS (80 - 800) from 0.063 to 0.072 min

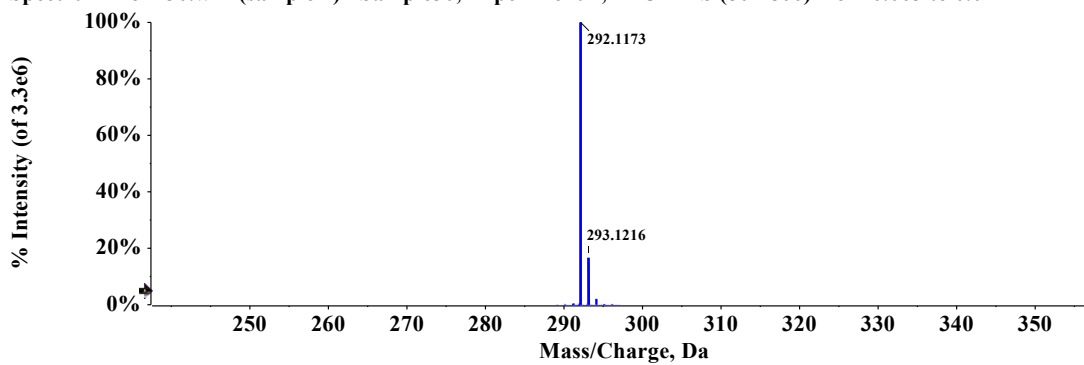

Compound 10s:

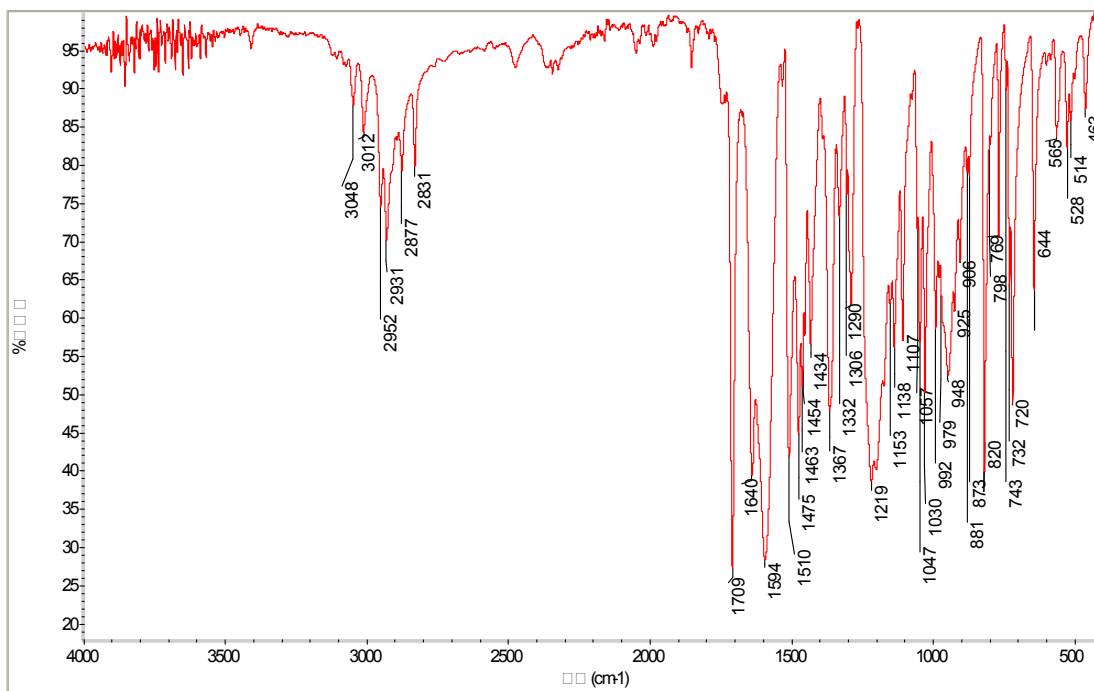

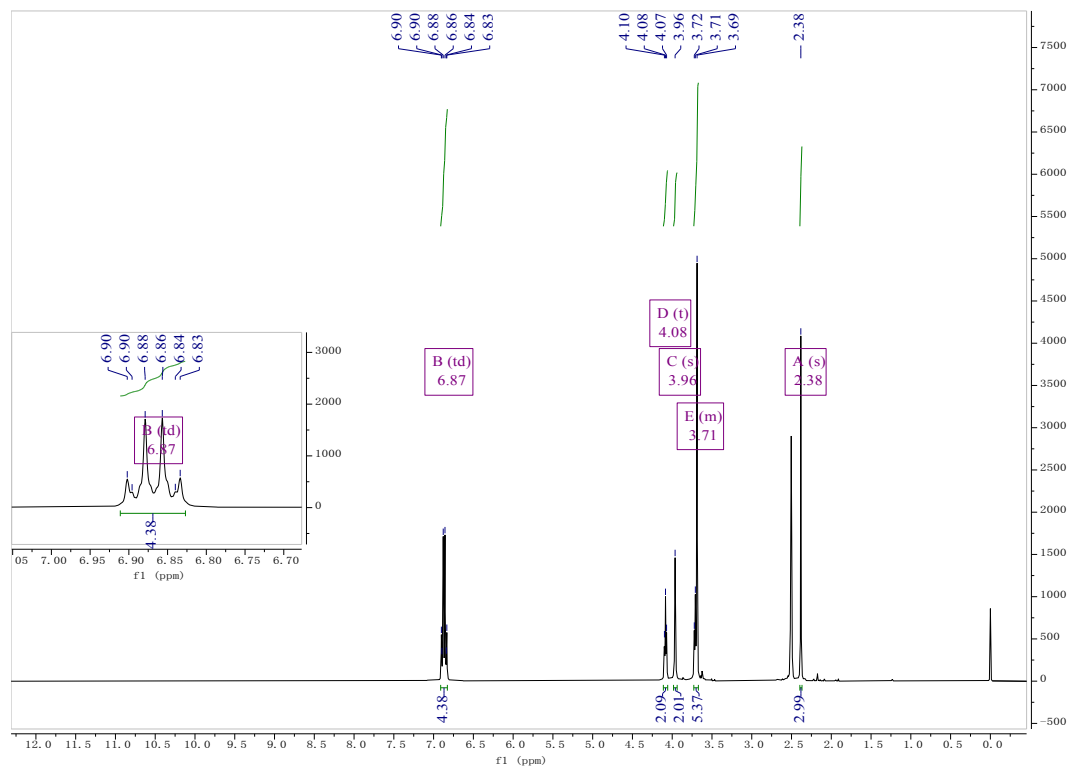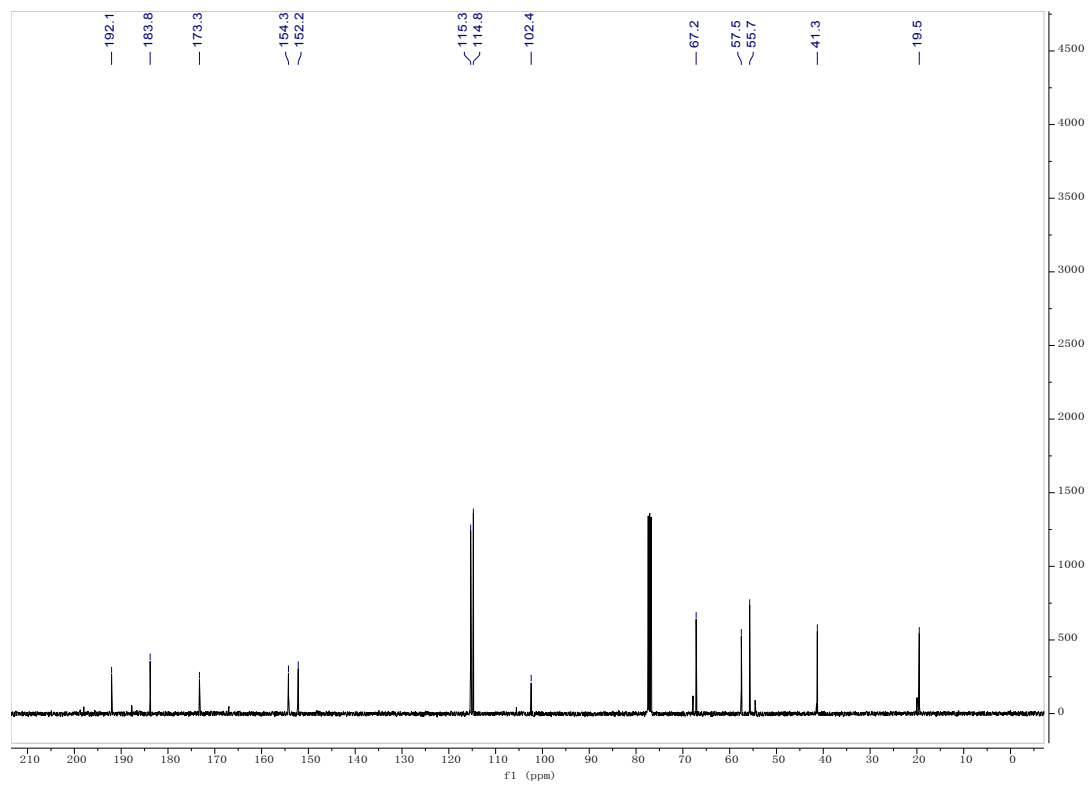

Spectrum from 31.wiff (sample 1) - Sample31, Experiment 1, +TOF MS (80 - 800) from 0.078 to 0.087 min

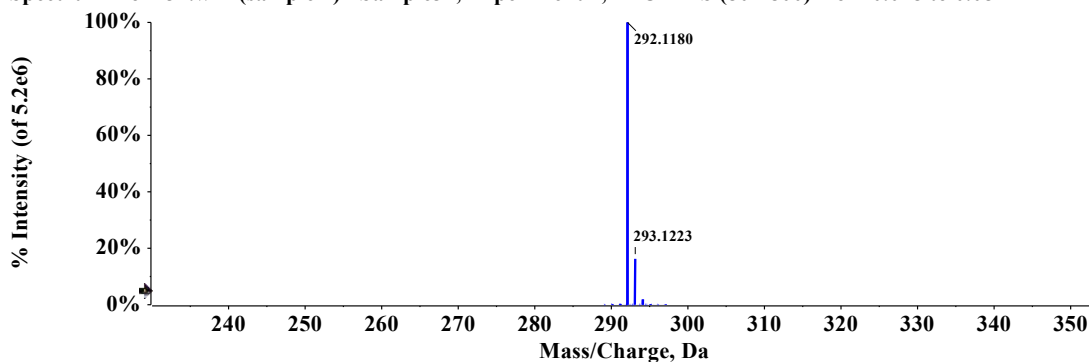

## 2. Crystallographic data of compound **10a**

**Table S1** Selected bond distances of crystal **10a**

| Molecule A |              | Molecule B |              |
|------------|--------------|------------|--------------|
| Bond       | Distance (Å) | Bond       | Distance (Å) |
| C11–C10    | 1.731(2)     | C12–C24    | 1.731(2)     |
| O1–C1      | 1.244(2)     | O5–C15     | 1.247(3)     |
| O2–C5      | 1.322(3)     | O6–C19     | 1.335(3)     |
| O3–C3      | 1.219(3)     | O7–C17     | 1.217(3)     |
| O4–C8      | 1.437(2)     | O8–C22     | 1.432(3)     |
| O4–C9      | 1.363(3)     | O8–C23     | 1.359(3)     |
| N1–C1      | 1.345(3)     | N2–C15     | 1.335(3)     |
| N1–C4      | 1.455(3)     | N2–C18     | 1.463(3)     |
| N1–C7      | 1.451(3)     | N2–C21     | 1.450(3)     |
| C1–C2      | 1.450(3)     | C15–C16    | 1.458(3)     |
| C2–C3      | 1.451(3)     | C16–C17    | 1.452(3)     |
| C2–C5      | 1.358(3)     | C16–C19    | 1.355(3)     |
| C3–C4      | 1.522(3)     | C17–C18    | 1.518(3)     |
| C5–C6      | 1.477(4)     | C19–C20    | 1.466(4)     |
| C7–C8      | 1.505(3)     | C21–C22    | 1.504(3)     |
| C9–C10     | 1.395(3)     | C23–C28    | 1.383(3)     |
| C9–C14     | 1.386(3)     | C23–C24    | 1.398(3)     |
| C10–C11    | 1.375(4)     | C24–C25    | 1.377(4)     |
| C11–C12    | 1.380(4)     | C25–C26    | 1.382(4)     |
| C12–C13    | 1.373(4)     | C26–C27    | 1.366(4)     |
| C13–C14    | 1.387(3)     | C27–C28    | 1.393(3)     |

**Table S2 Selected bond angles of crystal 10a**

| Molecule A  |            | Molecule B  |            |
|-------------|------------|-------------|------------|
| Bond angle  | Degree (°) | Bond angle  | Degree (°) |
| C1–N1–C4    | 112.33(17) | C15–N2 –C18 | 112.42(18) |
| C1–N1–C7    | 122.81(17) | C15–N2 –C21 | 123.58(18) |
| C4–N1–C7    | 124.24(18) | C18–N2 –C21 | 123.94(18) |
| O1–C1–C2    | 125.4(2)   | O5–C15–C16  | 125.0(2)   |
| N1–C1–C2    | 109.31(17) | N2–C15–C16  | 109.62(18) |
| O1–C1–N1    | 125.3(2)   | O5–C15–N2   | 125.4(2)   |
| C1–C2–C5    | 121.09(19) | C15–C16–C19 | 121.75(19) |
| C3–C2–C5    | 130.7(2)   | C17–C16–C19 | 130.8(2)   |
| C1–C2–C3    | 108.04(19) | C15–C16–C17 | 107.47(19) |
| O3–C3–C2    | 129.9(2)   | O7–C17–C16  | 129.3(2)   |
| C2–C3–C4    | 106.22(18) | C16–C17–C18 | 106.67(17) |
| O3–C3–C4    | 123.9(2)   | O7–C17–C18  | 124.0(2)   |
| N1–C4–C3    | 104.04(18) | N2–C18–C17  | 103.80(17) |
| O2–C5–C6    | 114.7(2)   | O6–C19–C20  | 114.7(2)   |
| C2–C5–C6    | 124.9(2)   | C16–C19–C20 | 125.4(2)   |
| O2–C5–C2    | 120.5(2)   | O6–C19–C16  | 119.9(2)   |
| N1–C7–C8    | 113.8(2)   | N2–C21–C22  | 113.6(2)   |
| O4–C8–C7    | 106.26(16) | O8–C22–C21  | 106.53(16) |
| C8–O4–C9    | 117.72(15) | C22–O8–C23  | 118.03(15) |
| O4–C9–C14   | 124.58(18) | O8–C23–C28  | 124.85(19) |
| O4–C9–C10   | 116.04(18) | O8–C23–C24  | 116.18(18) |
| C10–C9–C14  | 119.4(2)   | C24–C23–C28 | 119.0(2)   |
| Cl1–C10–C11 | 120.97(18) | Cl2–C24–C25 | 120.58(18) |
| Cl1–C10–C9  | 118.59(17) | Cl2–C24–C23 | 118.50(18) |
| C9–C10–C11  | 120.4(2)   | C23–C24–C25 | 120.9(2)   |
| C10–C11–C12 | 119.9(2)   | C24–C25–C26 | 119.5(2)   |
| C11–C12–C13 | 120.1(2)   | C25–C26–C27 | 120.2(2)   |
| C12–C13–C14 | 120.6(2)   | C26–C27–C28 | 120.9(2)   |
| C9–C14–C13  | 119.6(2)   | C23–C28–C27 | 119.6(2)   |
